# Supplementary material for: Design, Synthesis and Evaluation of Novel 1,4-Disubstituted Piperazine-2,5-dione Derivatives as Antioxidants against H2O2-Induced Oxidative Injury via the IL-6/Nrf2 Loop Pathway
Source: MDPI journal article supplement (doi:10.3390/antiox11102014), 2022-10-12

*Supporting Information for*

**Design, Synthesis and Evaluation of Novel 1,4-Disubstituted  
Piperazine-2,5-dione Derivatives as Antioxidants against H<sub>2</sub>O<sub>2</sub>-  
Induced Oxidative Injury via the IL-6/Nrf2 Loop Pathway**

Liang Xiong <sup>1,2,†</sup>, Hongshan Wu <sup>1,2,†</sup>, Ting Zhong <sup>1,2</sup>, Fang Luo <sup>1,2</sup>, Qing Li <sup>1,2</sup>, Mei Li <sup>1,2</sup>  
and Yanhua Fan <sup>1,2,\*</sup>

<sup>1</sup> State Key Laboratory for Functions and Applications of Medicinal Plants, Guizhou Medical University, Guiyang 550014, China

<sup>2</sup> The Key Laboratory of Chemistry for Natural Products of Guizhou Province and Chinese Academy of Sciences, Guiyang 550014, China

\* Correspondence: yhfan@gzcnpc.cn

† These authors contributed equally to this work.

Table S1

The impact of synthetic compounds on SH-SY5Y cytotoxicity

| Compd. | Viabilities of SH-SY5Y Cells |                   |                   |
|--------|------------------------------|-------------------|-------------------|
|        | 80( $\mu$ M)                 | 20( $\mu$ M)      | 5( $\mu$ M)       |
| 9a     | 109.1 $\pm$ 5.61             | 104.6 $\pm$ 4.71  | 93.05 $\pm$ 8.58  |
| 9b     | 84.20 $\pm$ 5.85             | 109.7 $\pm$ 2.65  | 113.2 $\pm$ 3.52  |
| 9c     | 111.6 $\pm$ 8.11             | 130.7 $\pm$ 19.42 | 85.87 $\pm$ 10.59 |
| 9d     | 109.8 $\pm$ 6.67             | 115.7 $\pm$ 3.96  | 106.8 $\pm$ 5.66  |
| 9e     | 120.4 $\pm$ 4.13             | 108.3 $\pm$ 2.33  | 114.5 $\pm$ 2.77  |
| 9f     | 91.23 $\pm$ 3.47             | 120.3 $\pm$ 5.16  | 92.88 $\pm$ 3.81  |
| 9g     | 101.1 $\pm$ 0.94             | 97.02 $\pm$ 0.68  | 107.6 $\pm$ 2.64  |
| 9h     | 95.36 $\pm$ 0.64             | 106.5 $\pm$ 1.23  | 115.2 $\pm$ 1.18  |
| 9i     | 103.7 $\pm$ 0.93             | 81.51 $\pm$ 5.06  | 91.87 $\pm$ 2.93  |
| 9j     | 100.3 $\pm$ 1.47             | 107.9 $\pm$ 1.08  | 109.7 $\pm$ 1.05  |
| 9k     | 105.6 $\pm$ 1.01             | 99.27 $\pm$ 1.33  | 117.9 $\pm$ 1.74  |
| 9l     | 112.5 $\pm$ 1.52             | 114.3 $\pm$ 1.03  | 93.57 $\pm$ 6.01  |
| 9m     | 98.77 $\pm$ 2.21             | 101.4 $\pm$ 2.64  | 117.3 $\pm$ 7.96  |
| 9n     | 113.1 $\pm$ 6.19             | 107.7 $\pm$ 8.49  | 98.65 $\pm$ 1.11  |
| 9o     | 107.7 $\pm$ 5.38             | 113.4 $\pm$ 6.76  | 113.5 $\pm$ 6.58  |
| 9p     | 117.9 $\pm$ 4.23             | 112.6 $\pm$ 3.85  | 114.3 $\pm$ 5.58  |
| 9q     | 103.1 $\pm$ 1.56             | 107.6 $\pm$ 1.01  | 106.5 $\pm$ 2.95  |
| 9r     | 114.1 $\pm$ 7.61             | 119.3 $\pm$ 8.86  | 95.25 $\pm$ 4.85  |
| 9s     | 101.8 $\pm$ 0.69             | 101.1 $\pm$ 0.74  | 109.3 $\pm$ 3.66  |

**<sup>1</sup>H, <sup>13</sup>C, <sup>19</sup>F NMR spectra and HR-MS (ESI) of compounds***1-(3,5-dimethoxyphenyl)-4-(4-methoxybenzoyl)piperazine-2,5-dione (9a)*

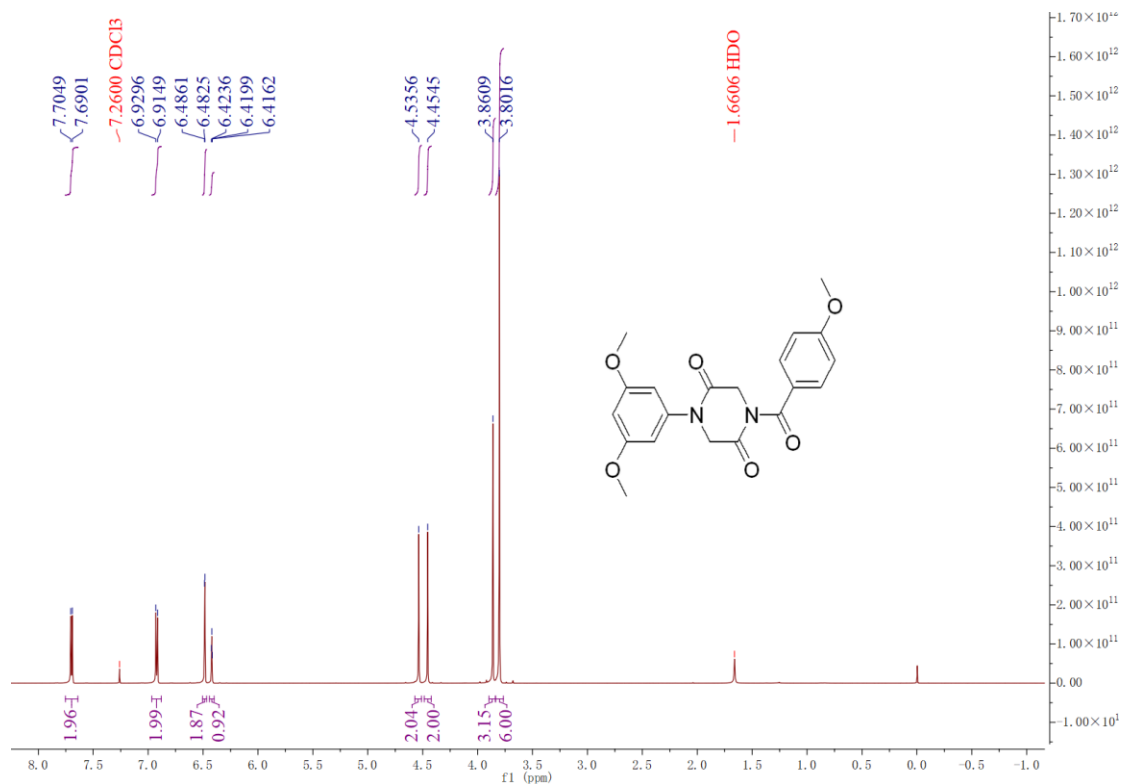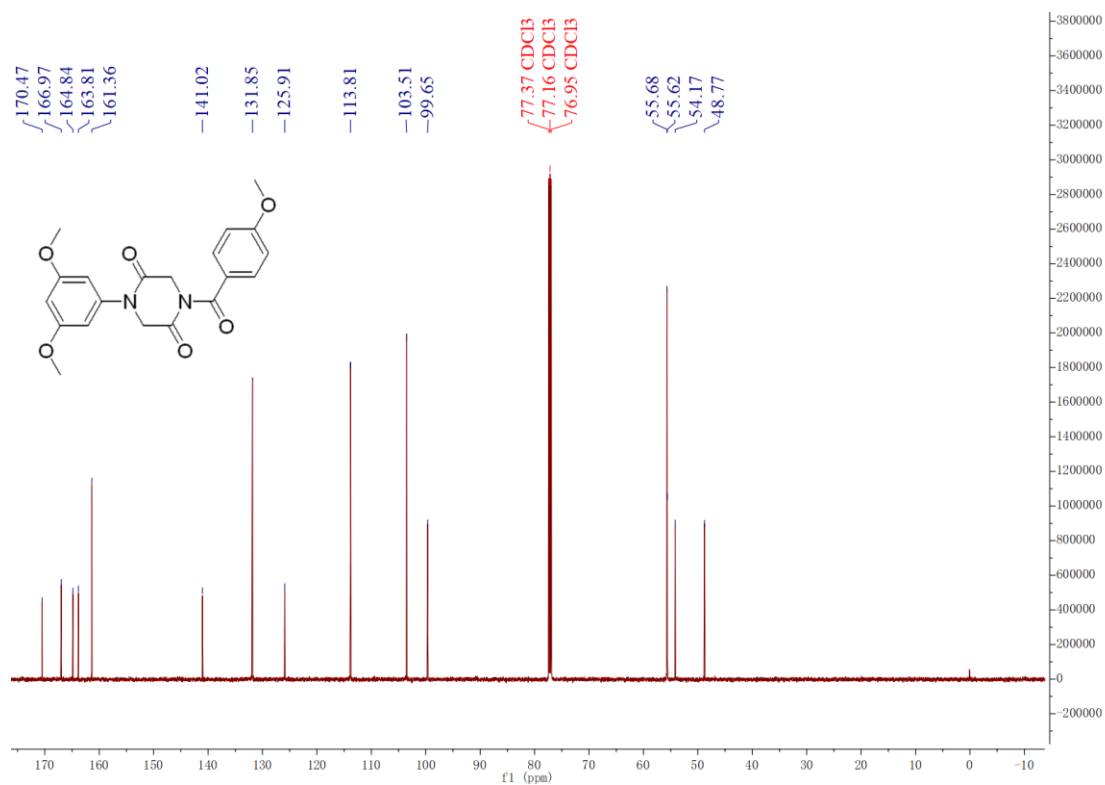

X1 #73 RT: 0.32 AV: 1 NL: 1.04E9  
T: FTMS + p ESI Full ms [100.0000-1500.0000]

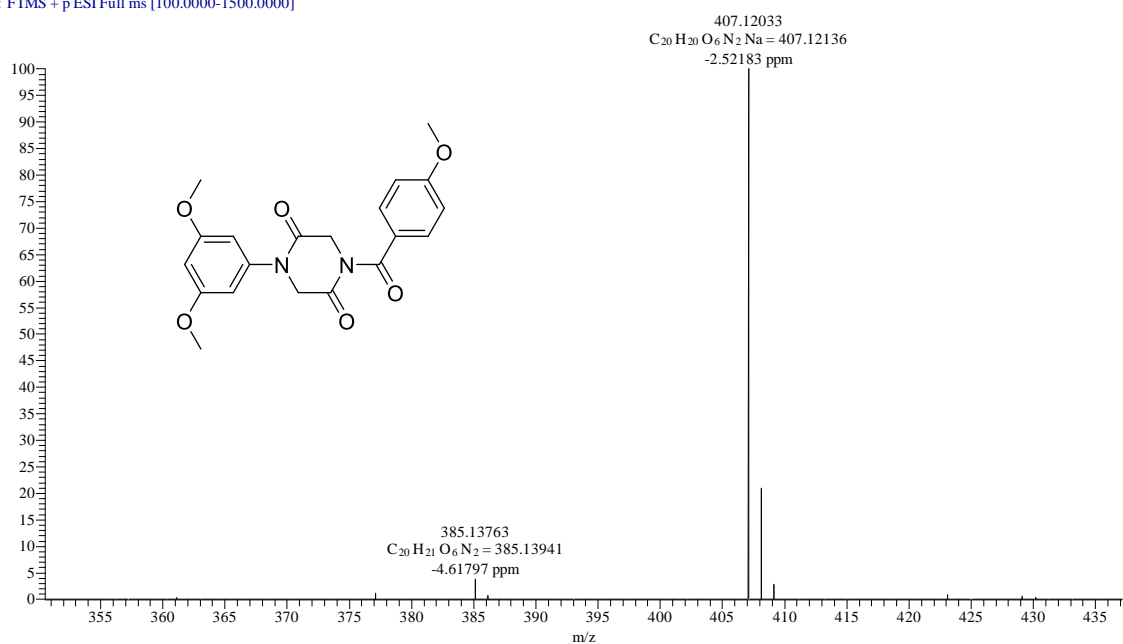

1-(3,5-dimethoxyphenyl)-4-(4-methylbenzoyl)piperazine-2,5-dione (**9b**)

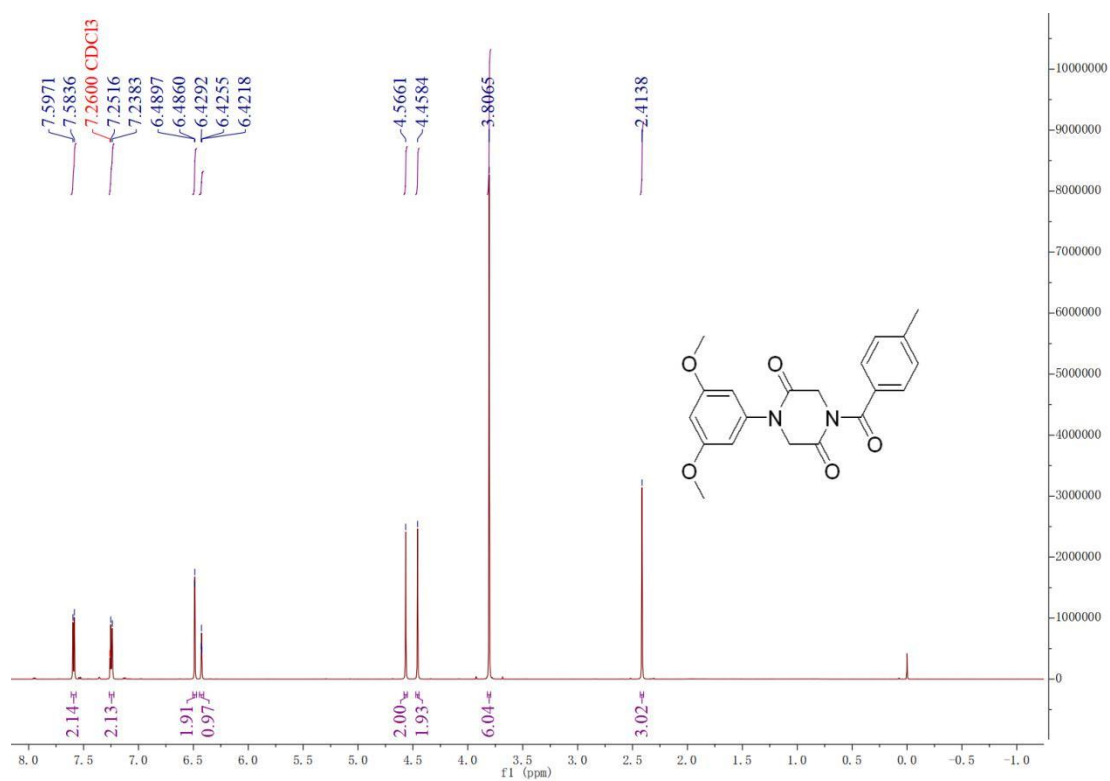

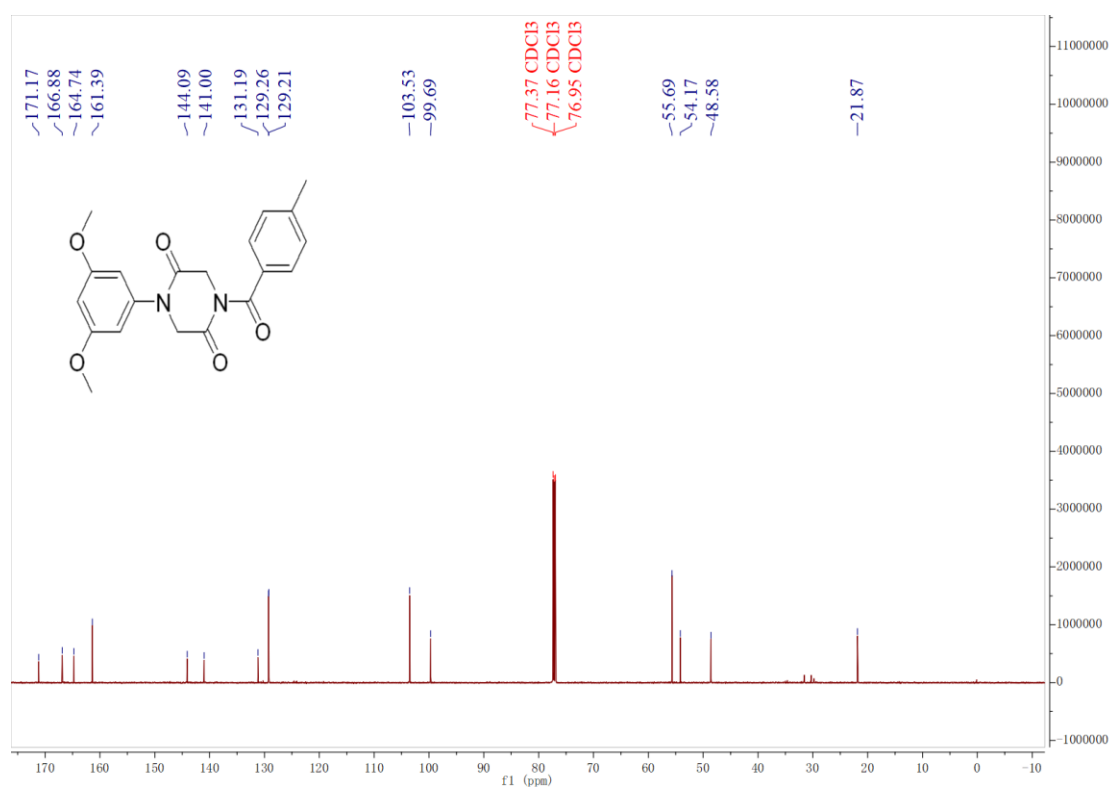

X2 #47 RT: 0.21 AV: 1 NL: 9.11E8  
T: FTMS + p ESI Full ms [100.0000-1500.0000]

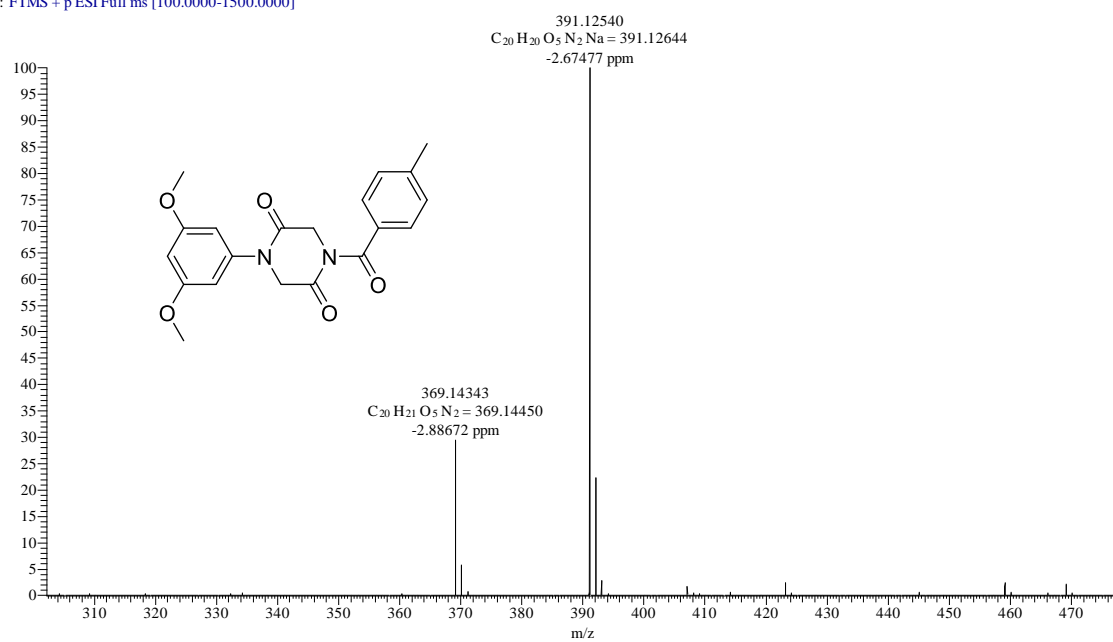

*1-(4-methylbenzoyl)-4-(3,4-methylenedioxyphenyl)piperazine-2,5-dione (9c)*

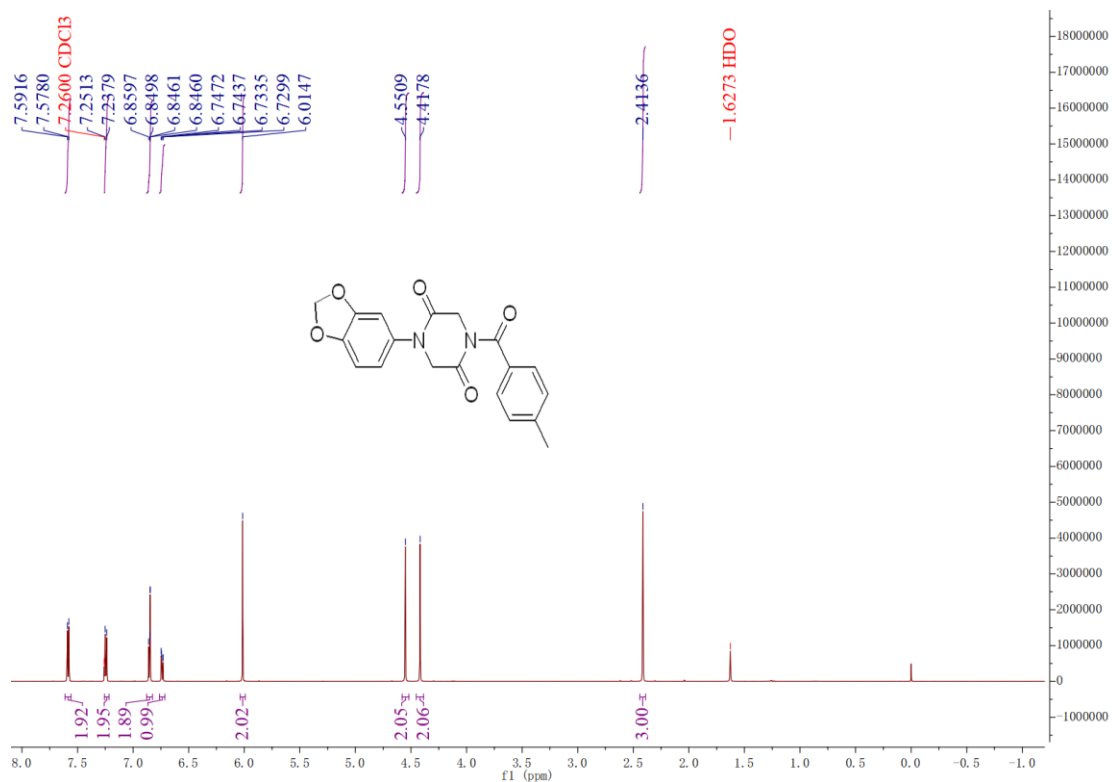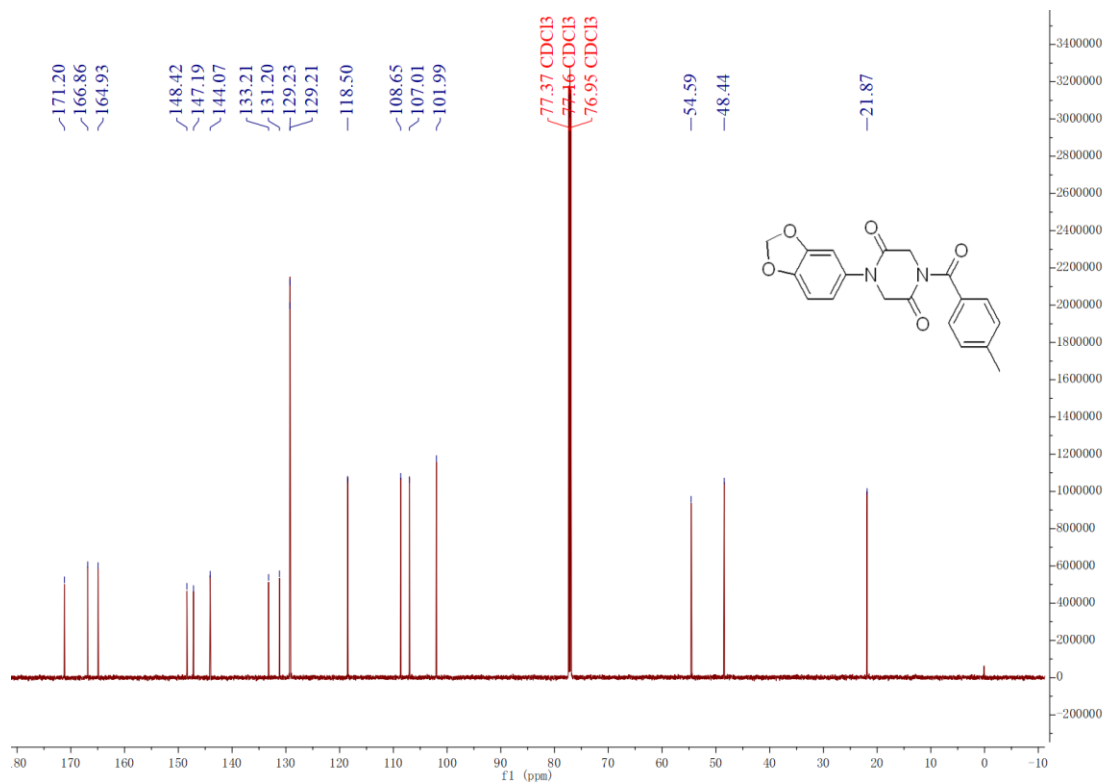

X21 #39 RT: 0.17 AV: 1 NL: 1.79E9  
T: FTMS + p ESI Full ms [100.0000-1500.0000]

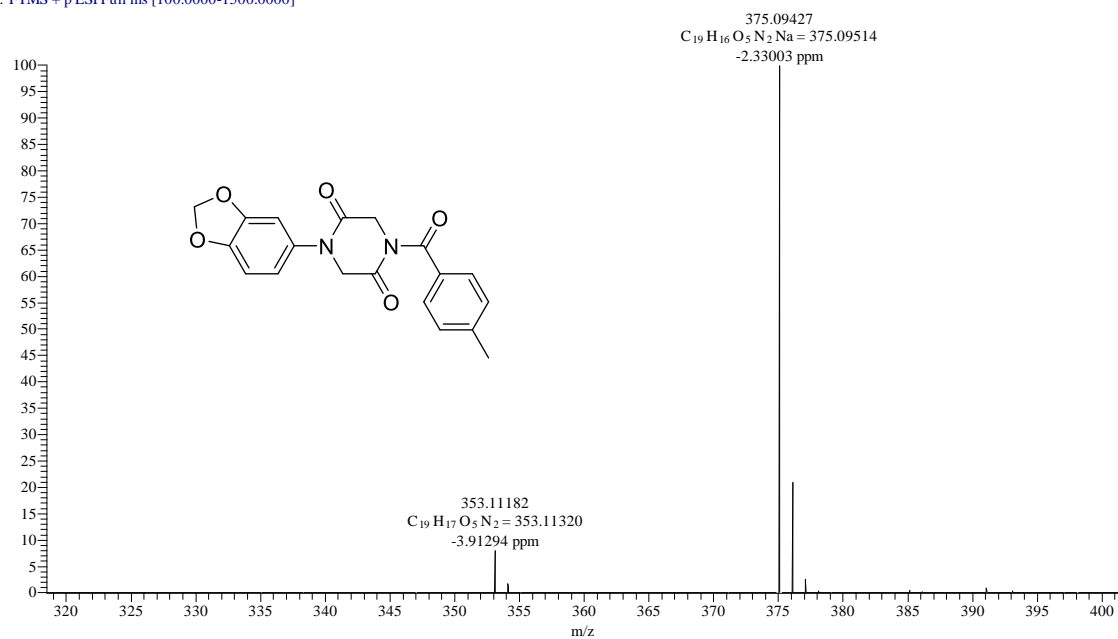

1-(4-methylbenzoyl)-4-phenylpiperazine-2,5-dione (**9d**)

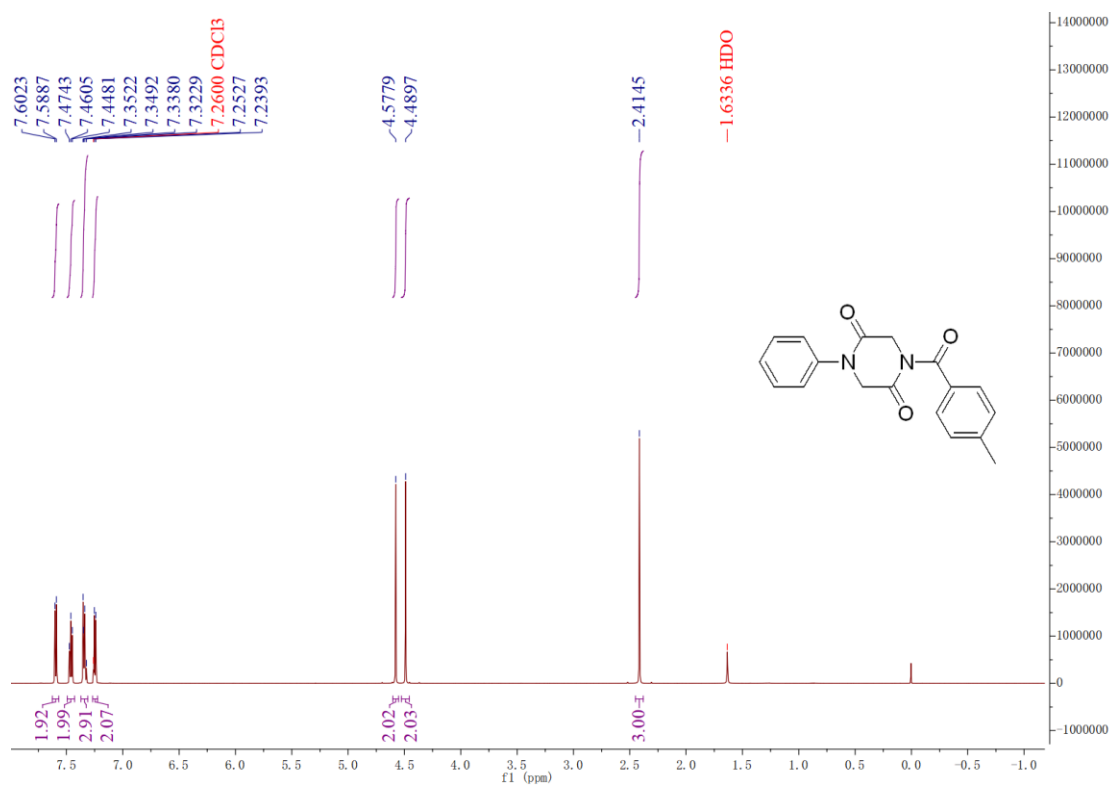

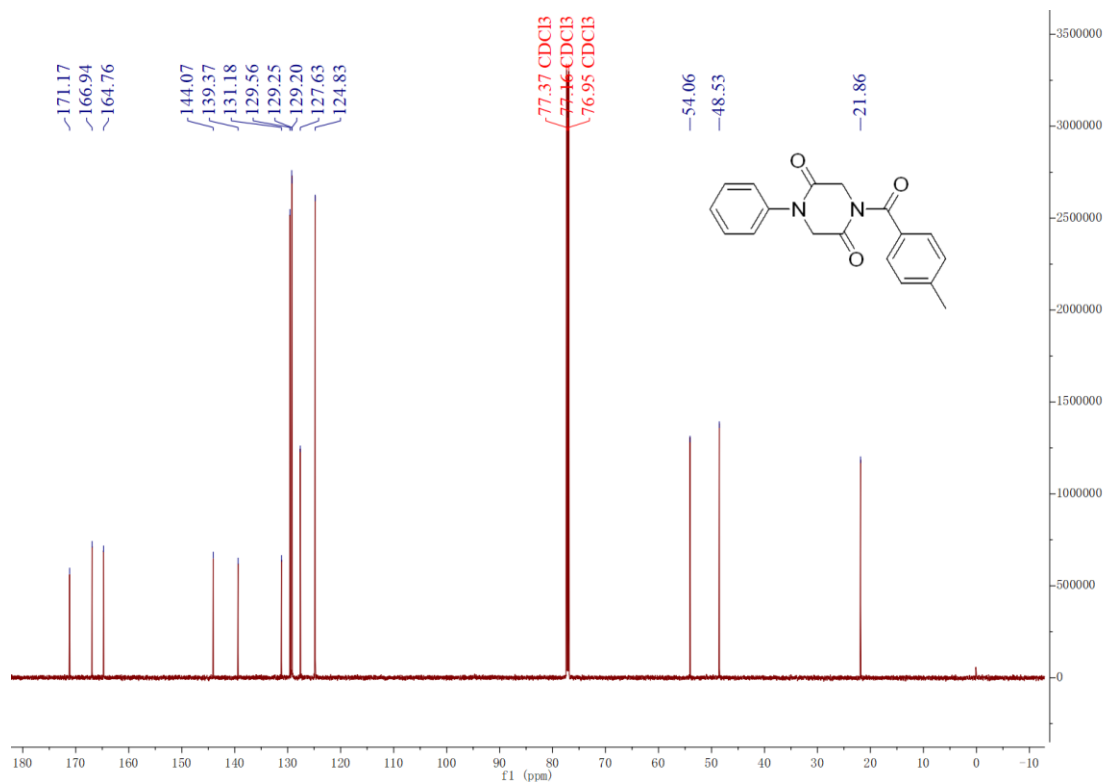

X22 #39 RT: 0.17 AV: 1 NL: 4.52E9  
T: FTMS + p ESI Full ms [100.0000-1500.0000]

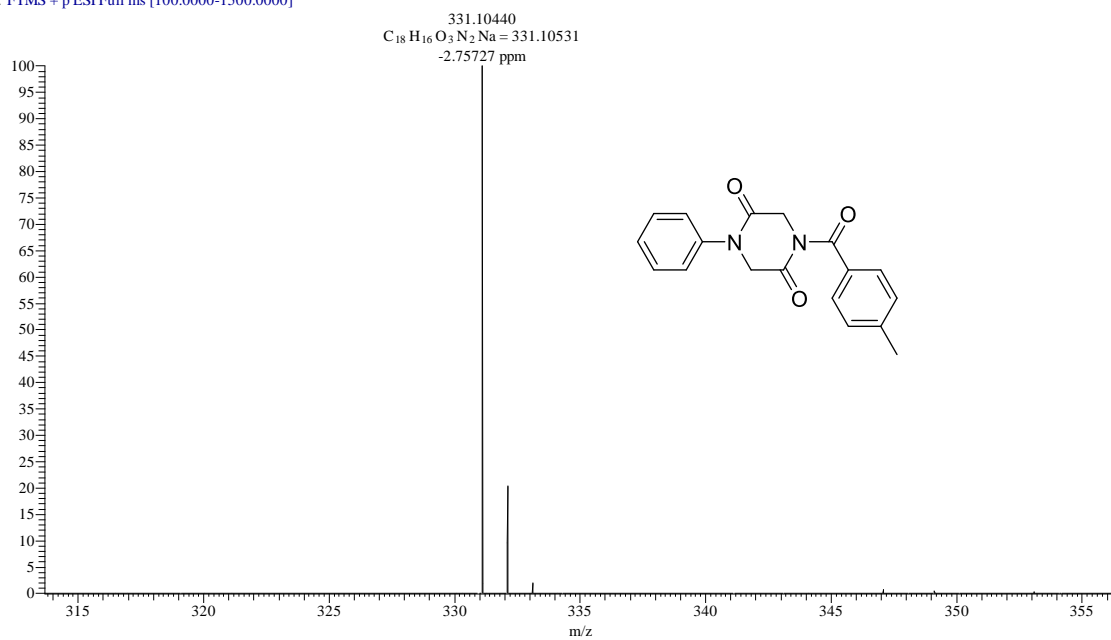

*1-(3-methoxyphenyl)-4-(4-methylbenzoyl)piperazine-2,5-dione (9e)*

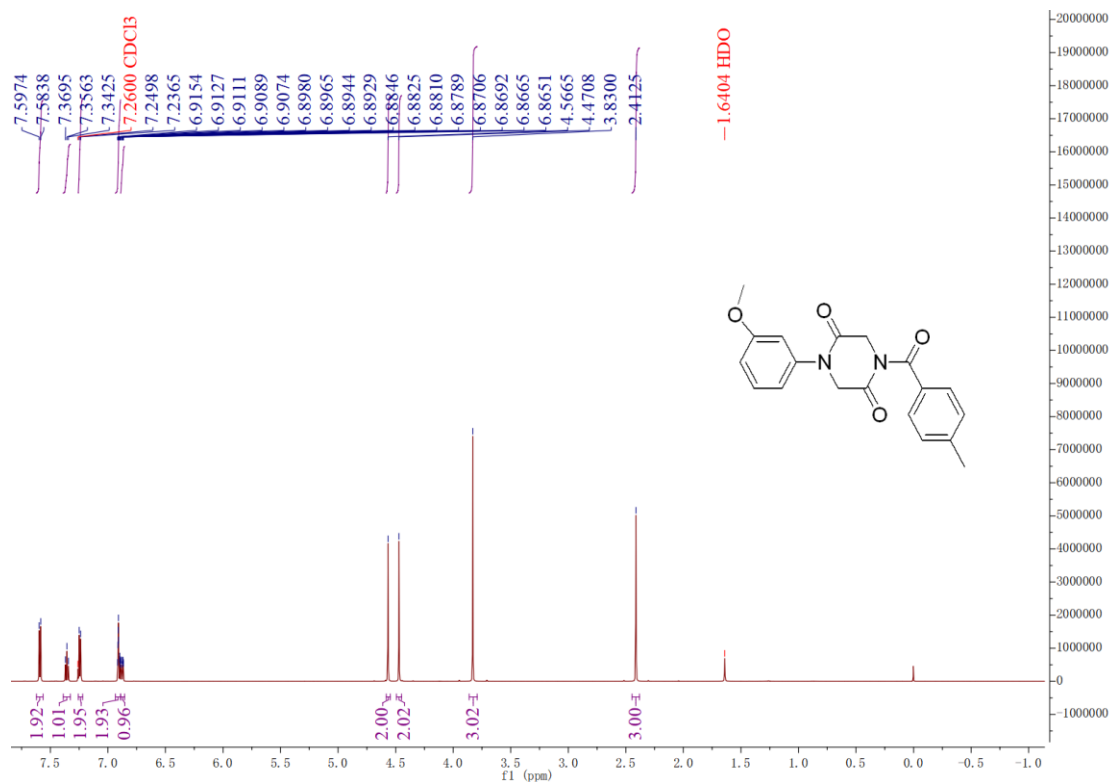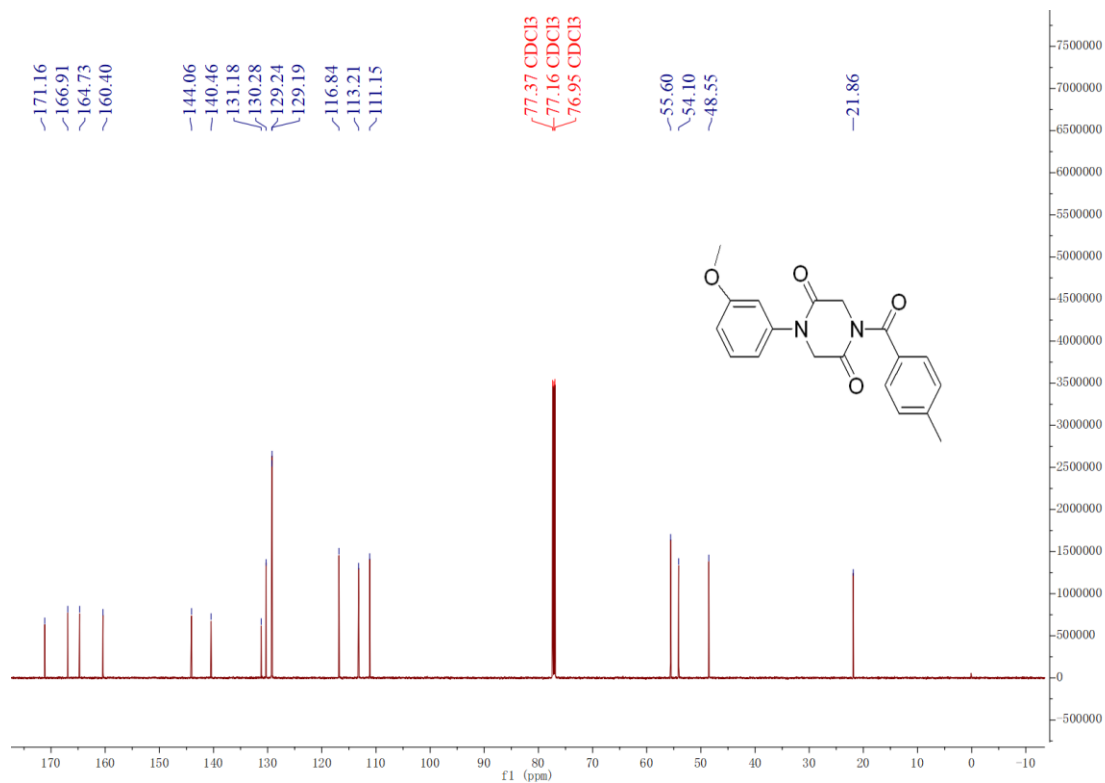

X23 #25 RT: 0.11 AV: 1 NL: 1.59E9  
T: FTMS + p ESI Full ms [100.0000-1500.0000]

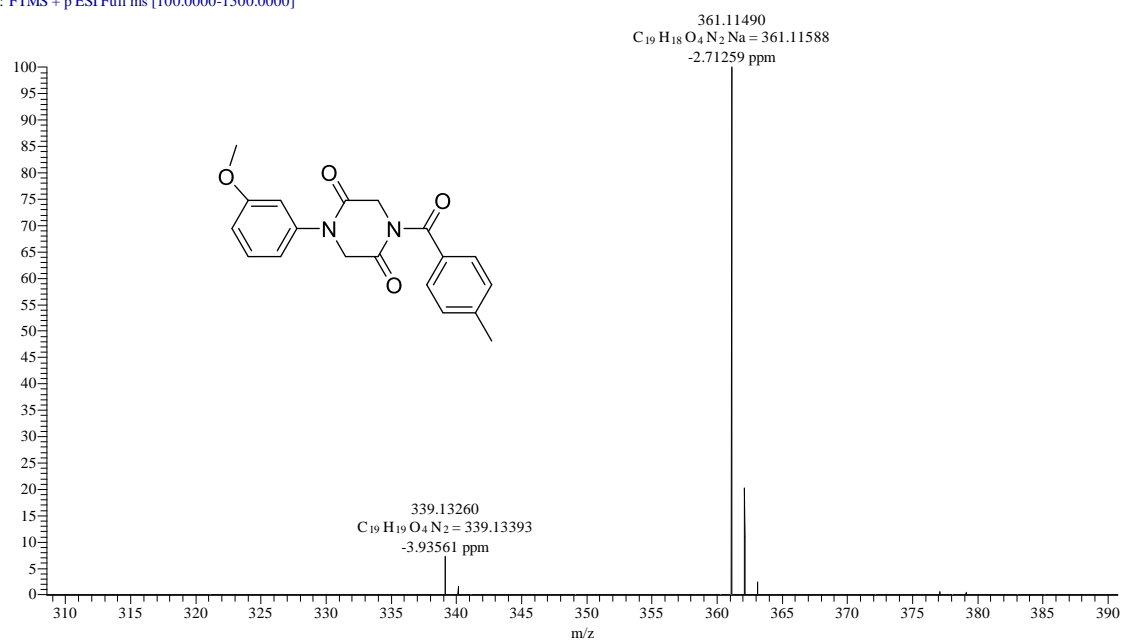

*1-(4-methoxyphenyl)-4-(4-methylbenzoyl)piperazine-2,5-dione (9f)*

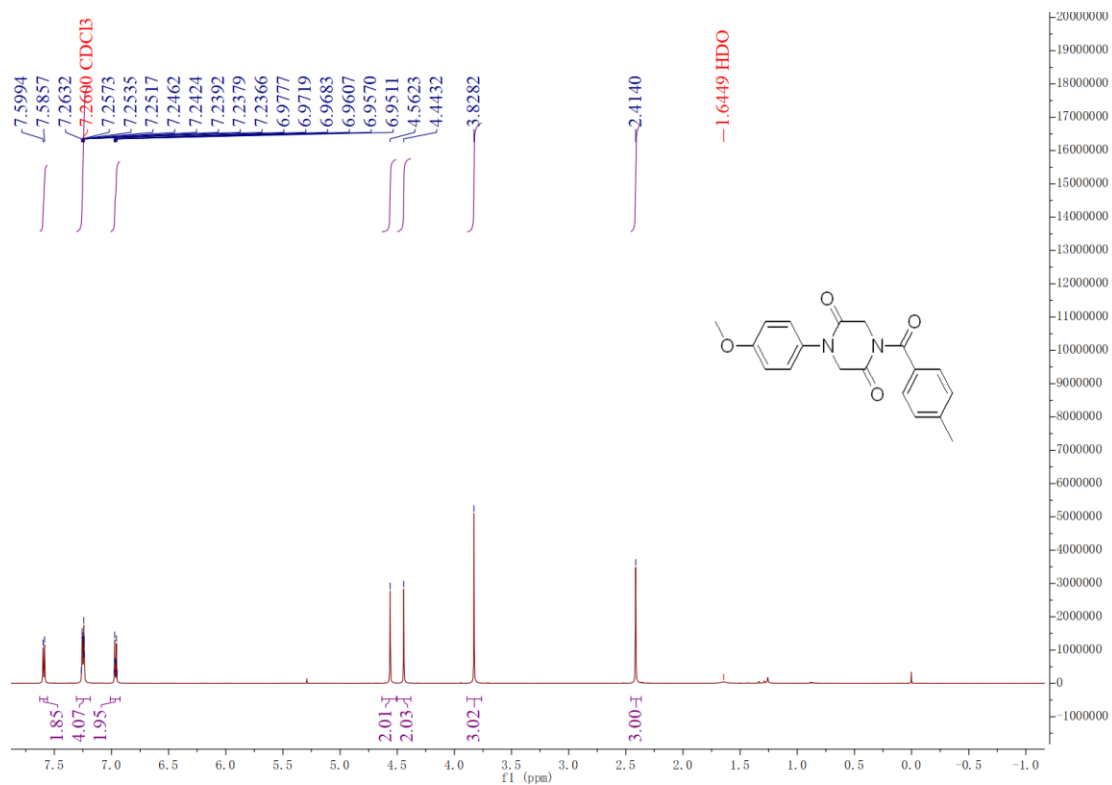

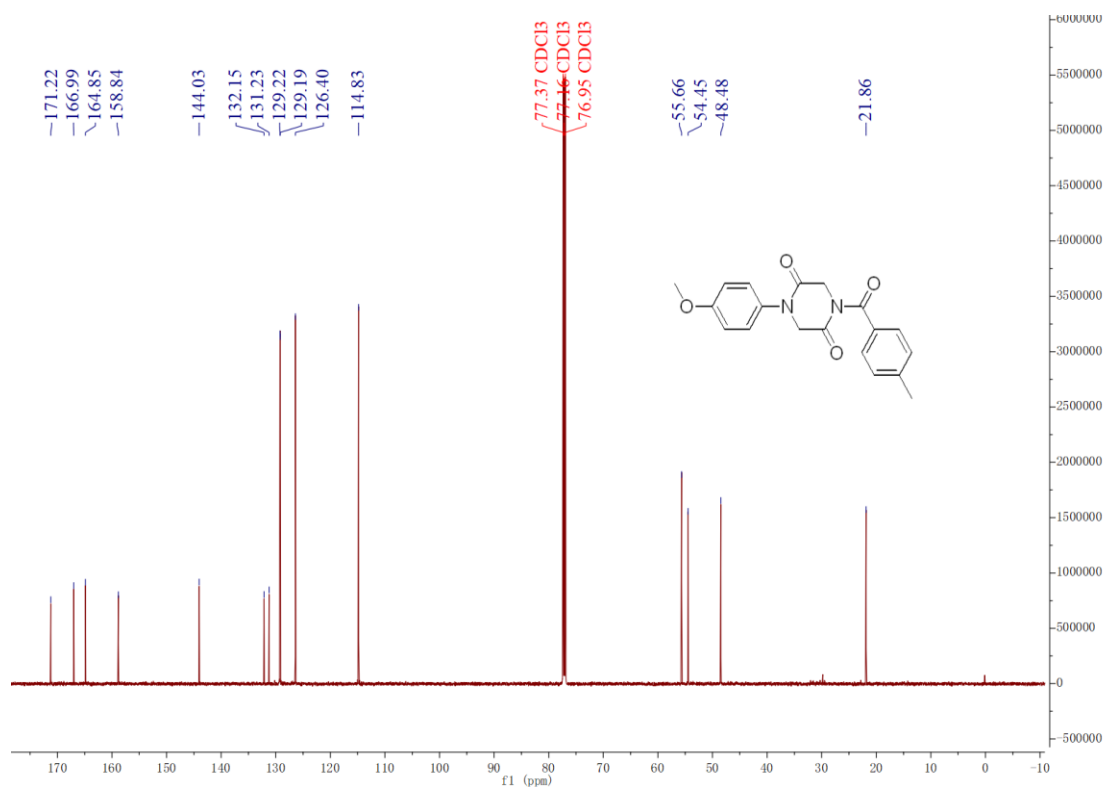

X24 #27 RT: 0.12 AV: 1 NL: 4.51E8  
T: FTMS + p ESI Full ms [100.0000-1500.0000]

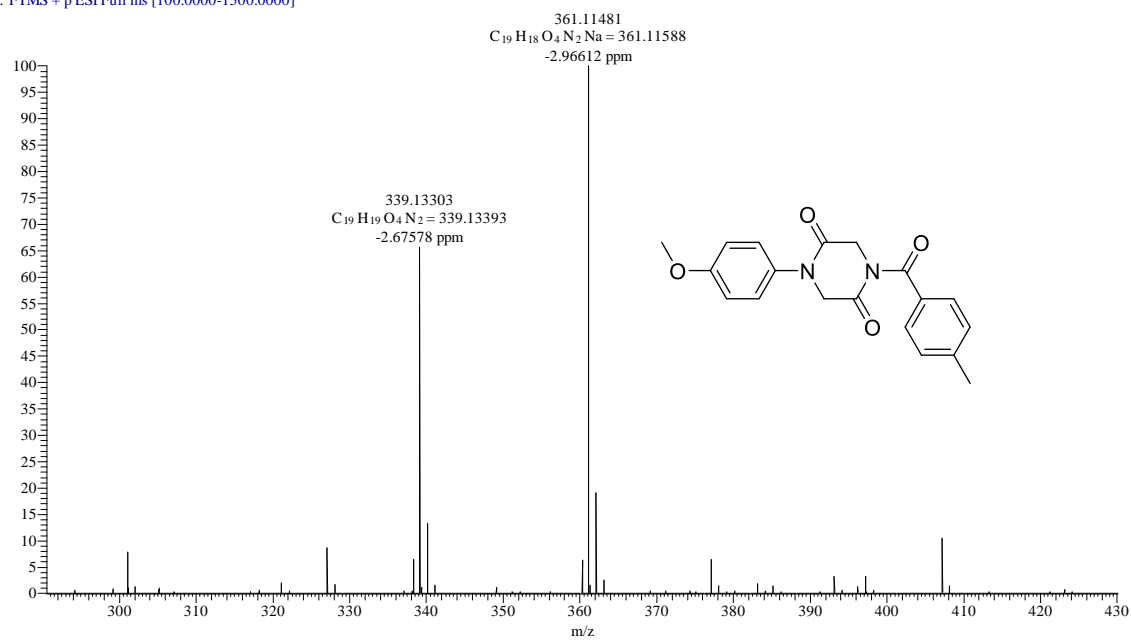

*1-(3,5-dimethoxyphenyl)-4-benzoylpiperazine-2,5-dione (9g)*

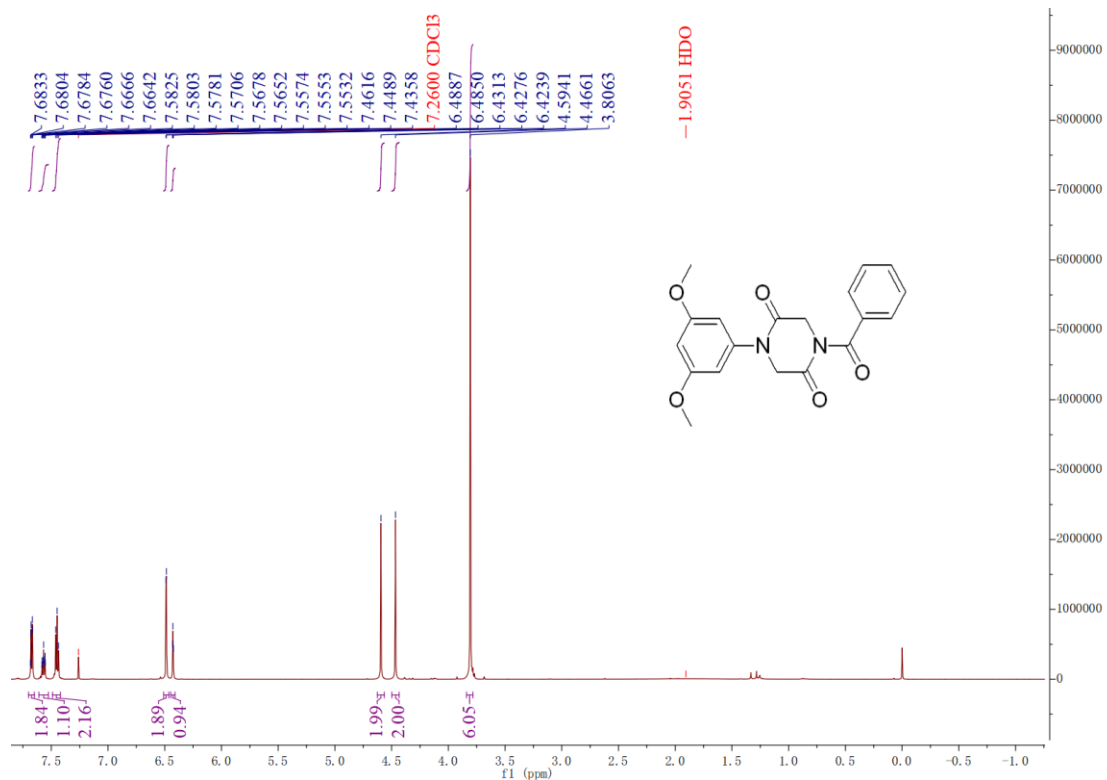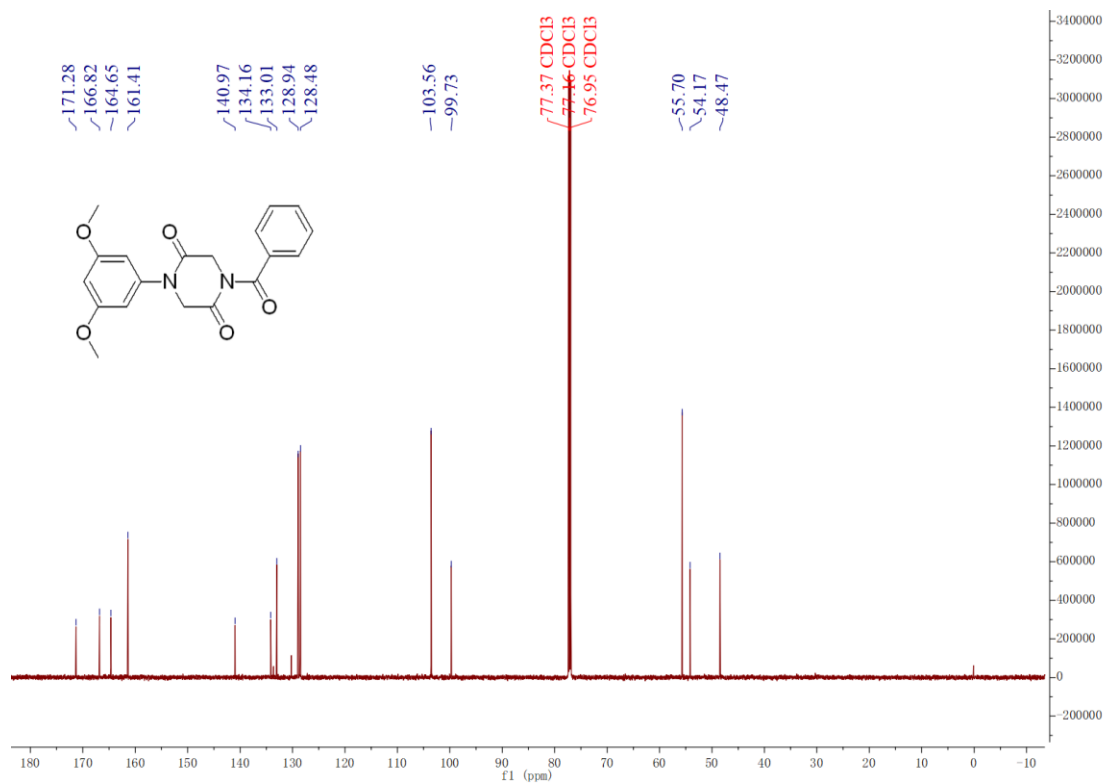

X3 #37 RT: 0.16 AV: 1 NL: 1.40E9  
T: FTMS + p ESI Full ms [100.0000-1500.0000]

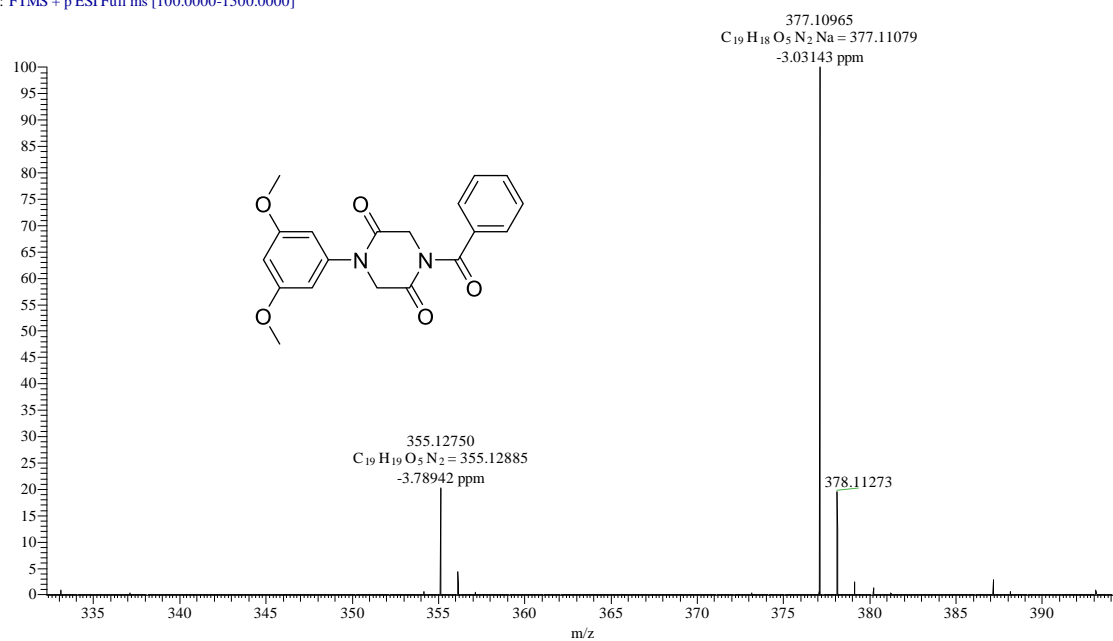

1-(3,5-dimethoxyphenyl)-4-(4-fluorobenzoyl)piperazine-2,5-dione (9h)

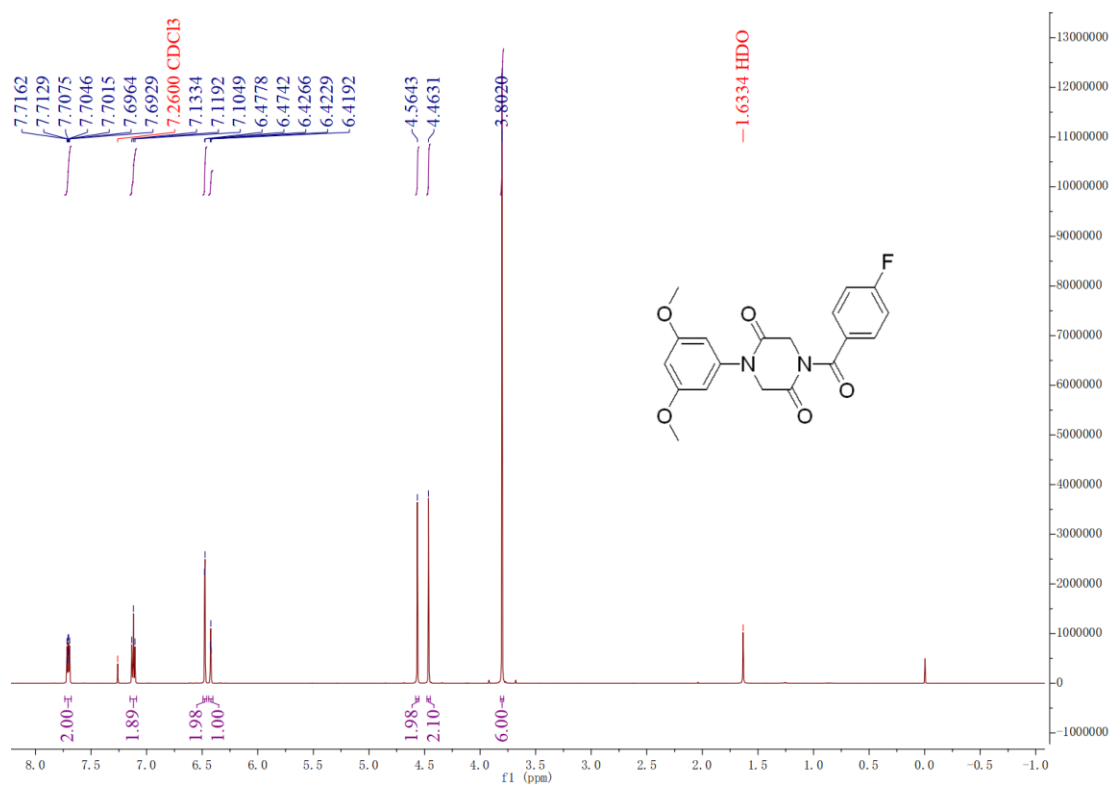

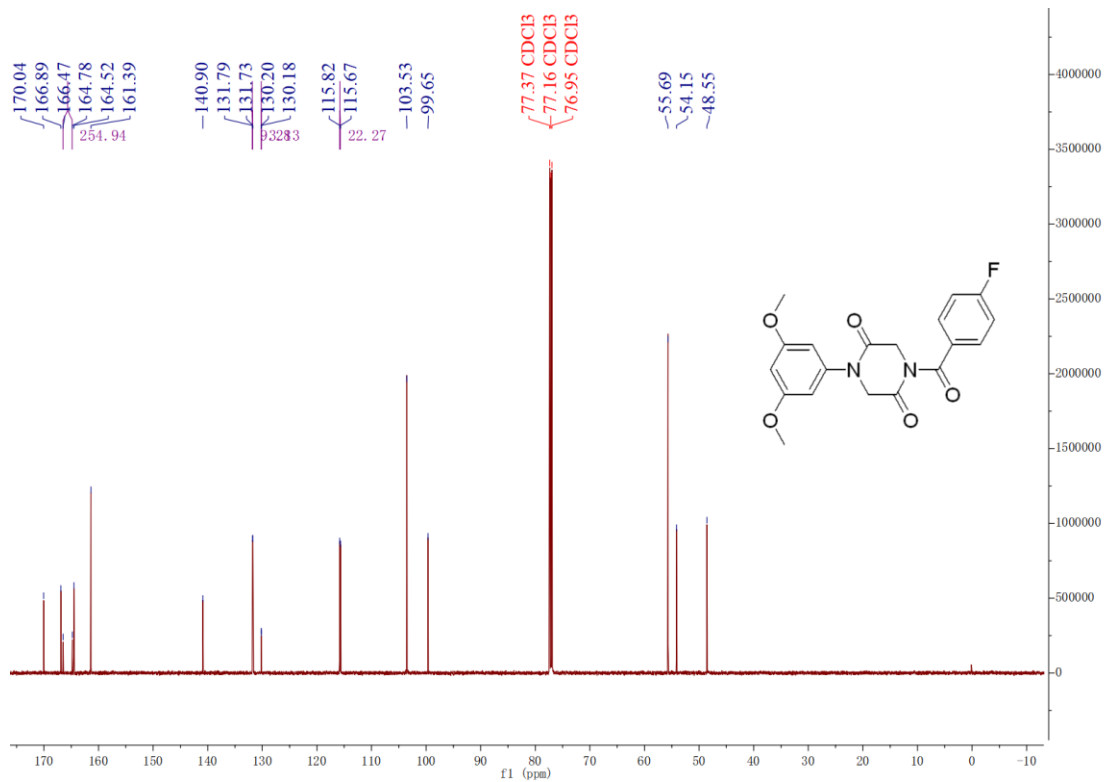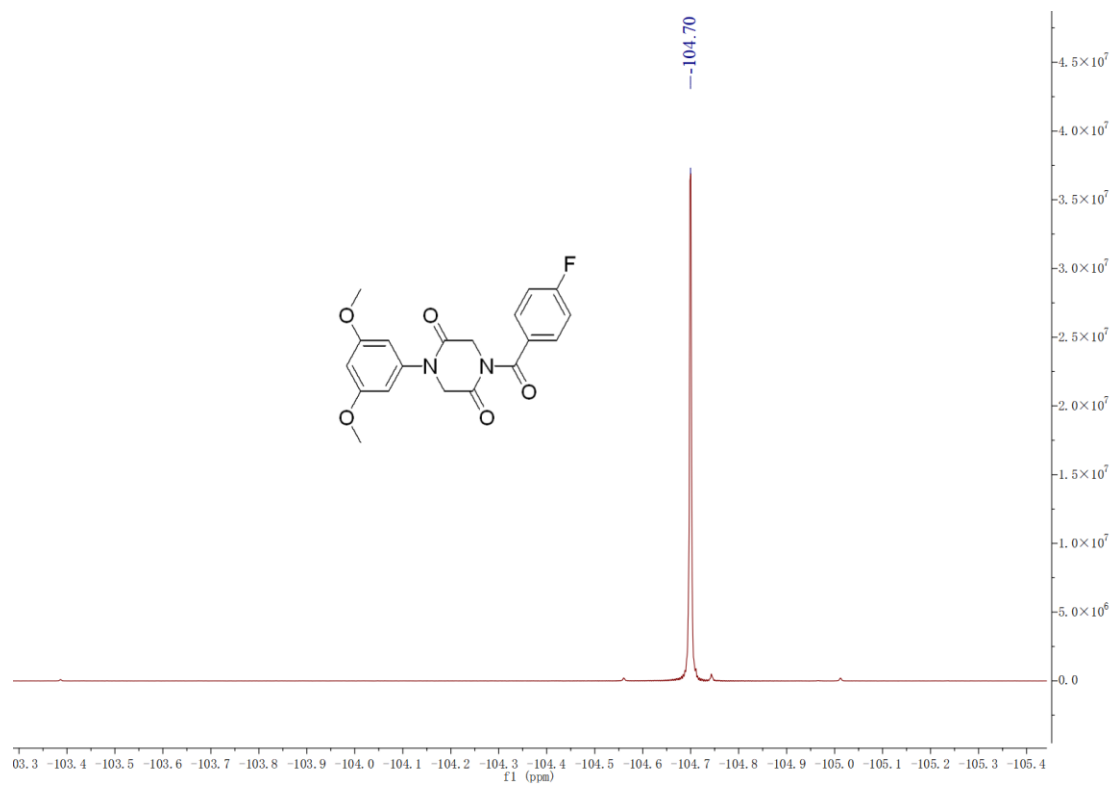

X4 #76 RT: 0.34 AV: 1 NL: 1.22E9  
T: FTMS + p ESI Full ms [100.0000-1500.0000]

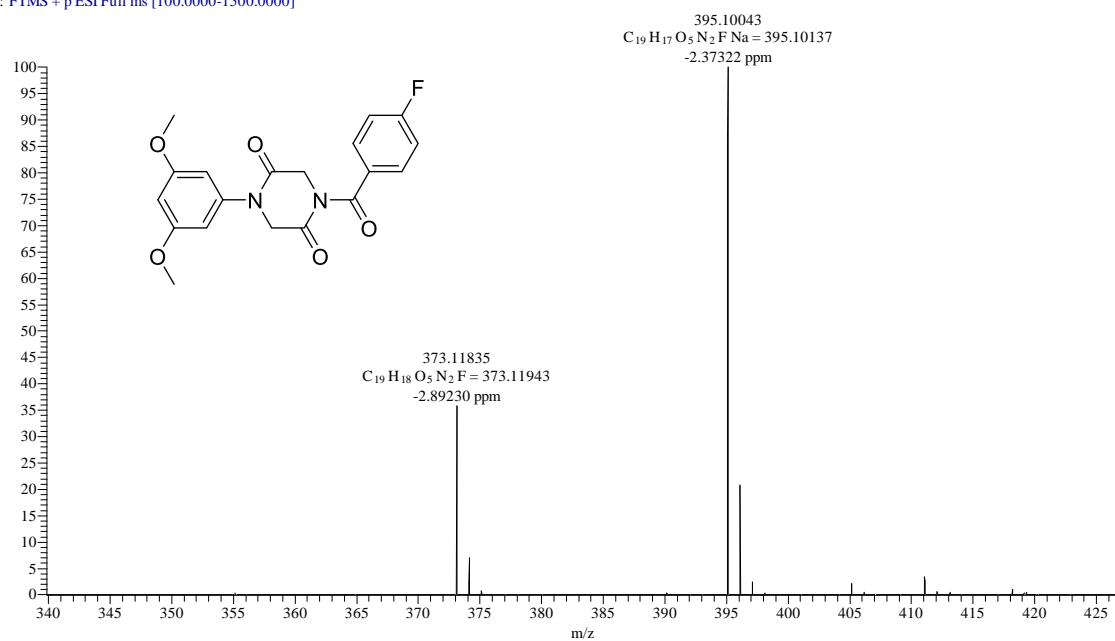

1-(3,5-dimethoxyphenyl)-4-(4-(trifluoromethyl)benzoyl)piperazine-2,5-dione (**9i**)

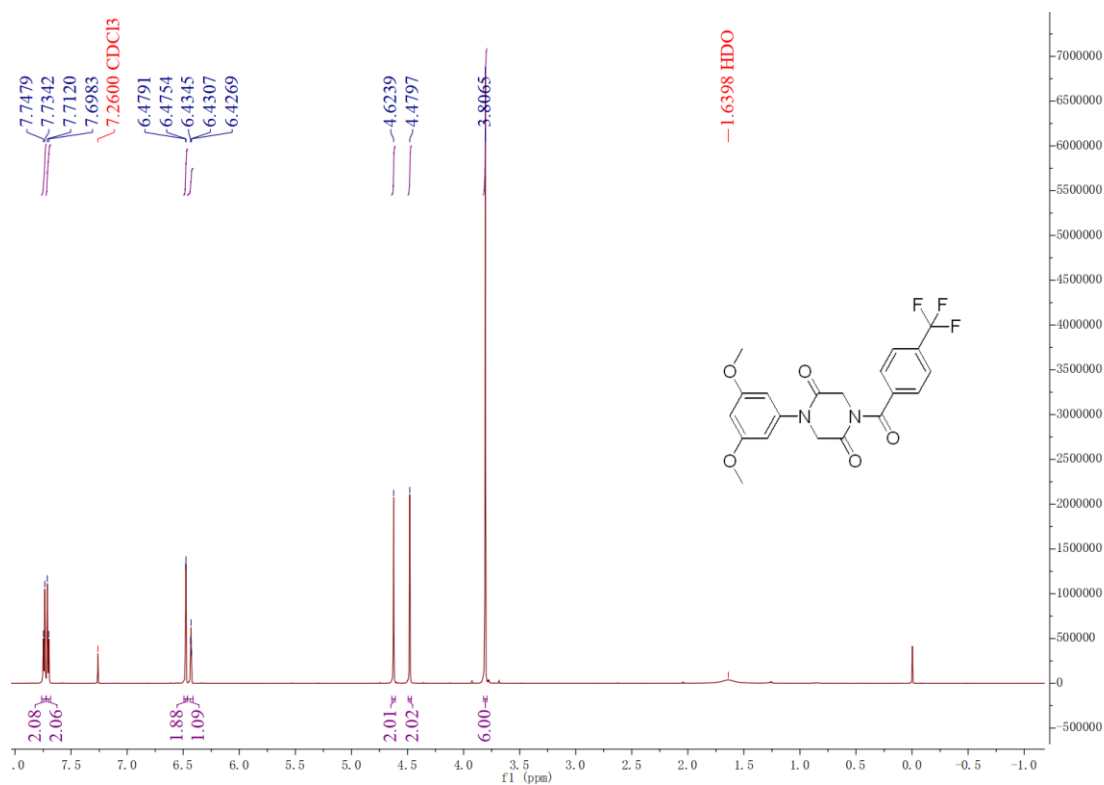

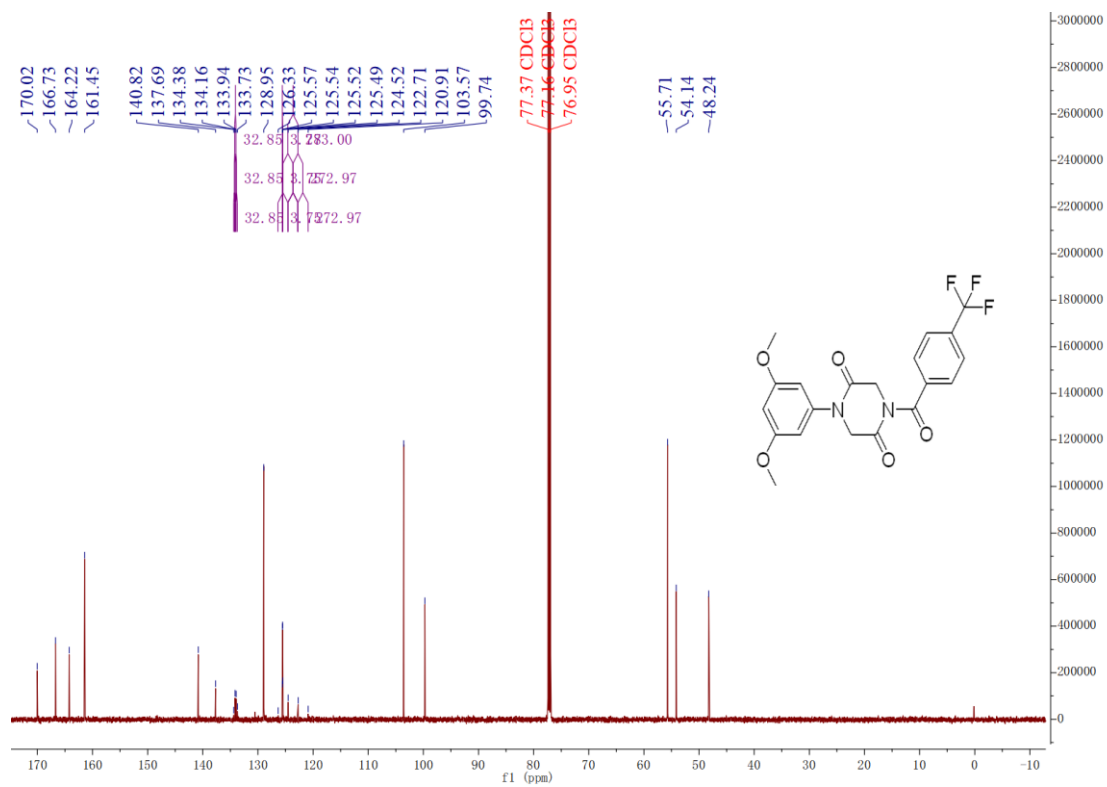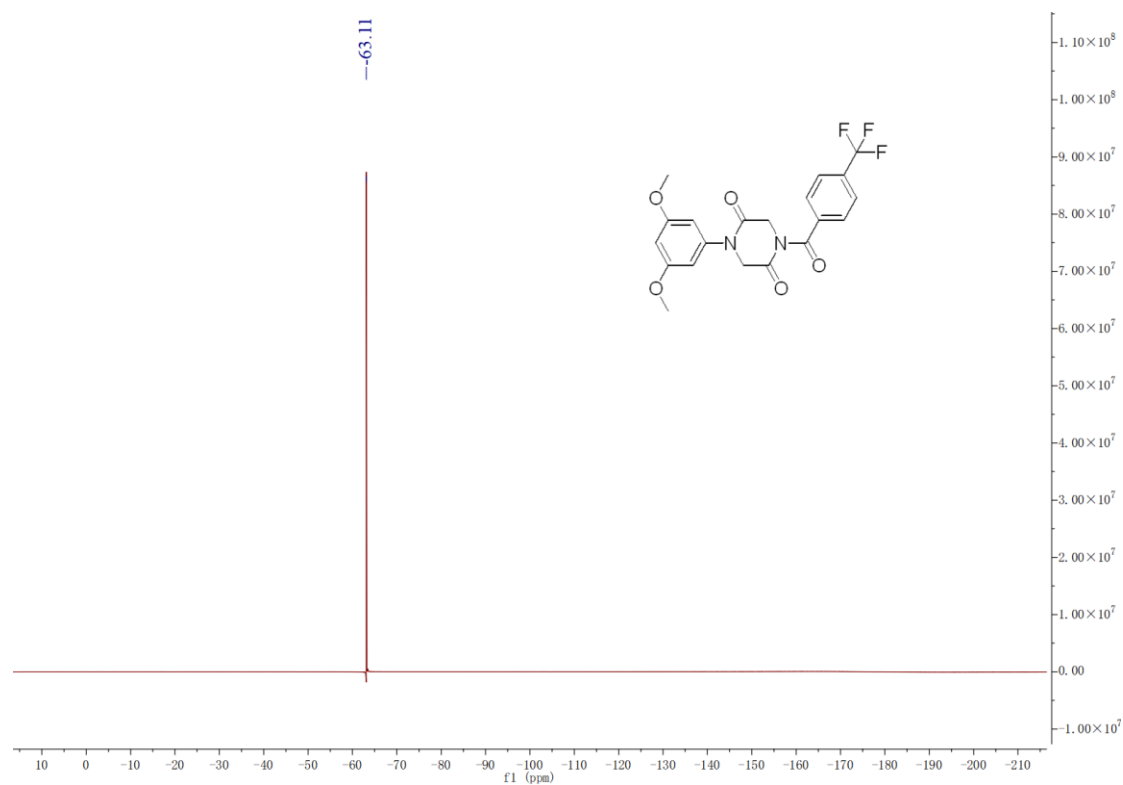

X5 #66 RT: 0.29 AV: 1 NL: 1.54E9  
T: FTMS + p ESI Full ms [100.0000-1500.0000]

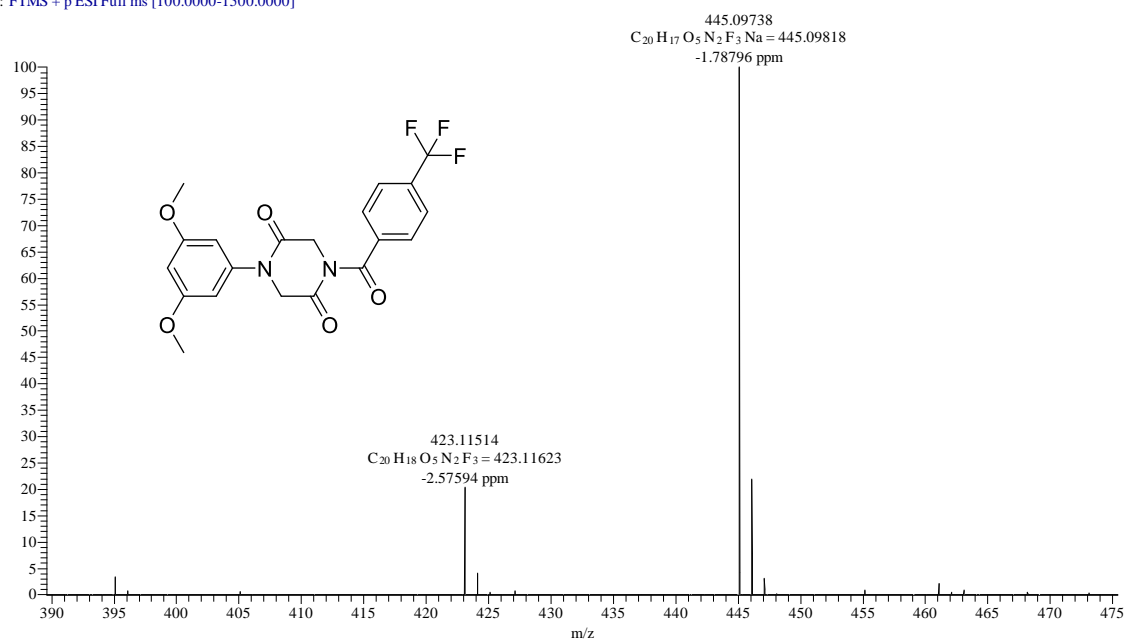

1-(3,5-dimethoxyphenyl)-4-(4-(tert-butyl)benzoyl)piperazine-2,5-dione (9j)

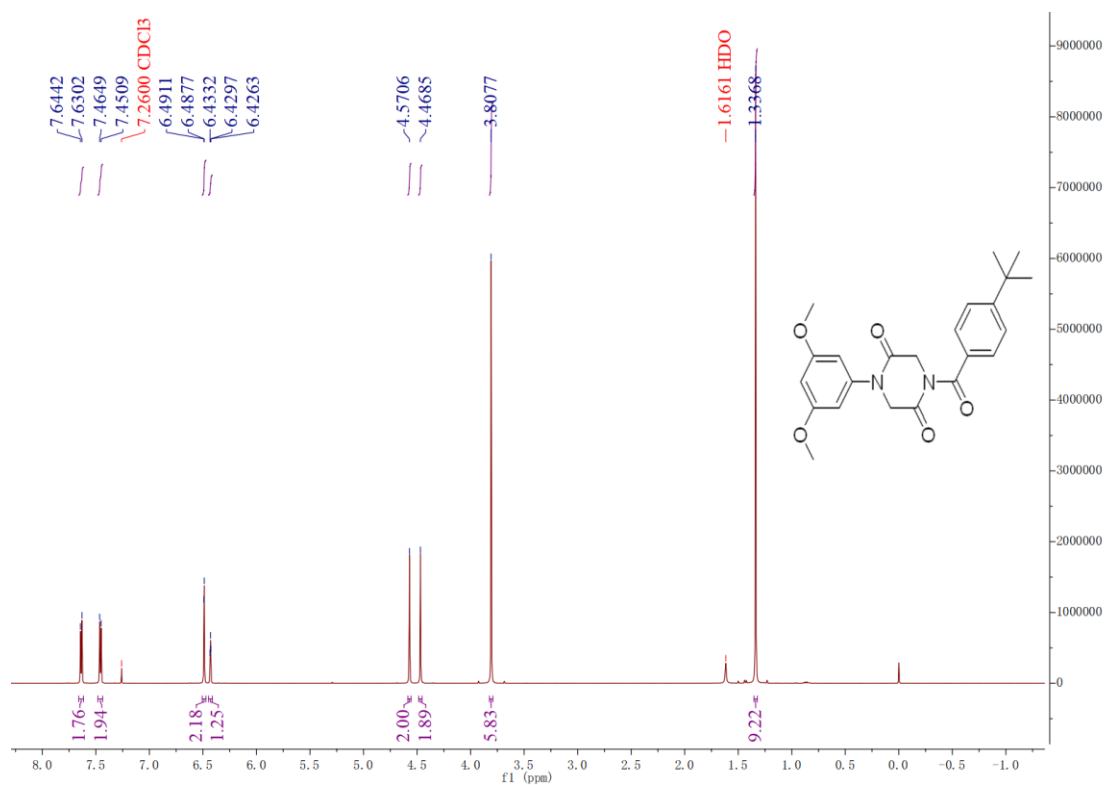

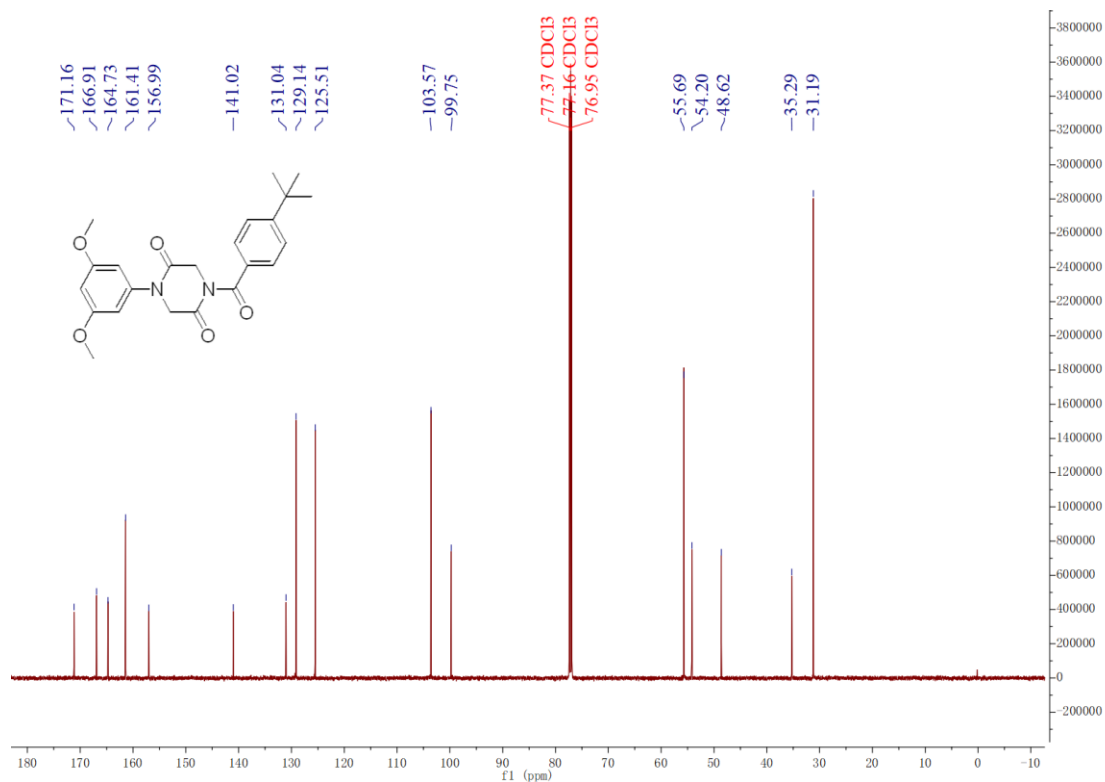

X6 #37 RT: 0.16 AV: 1 NL: 9.03E8  
T: FTMS + p ESI Full ms [100.0000-1500.0000]

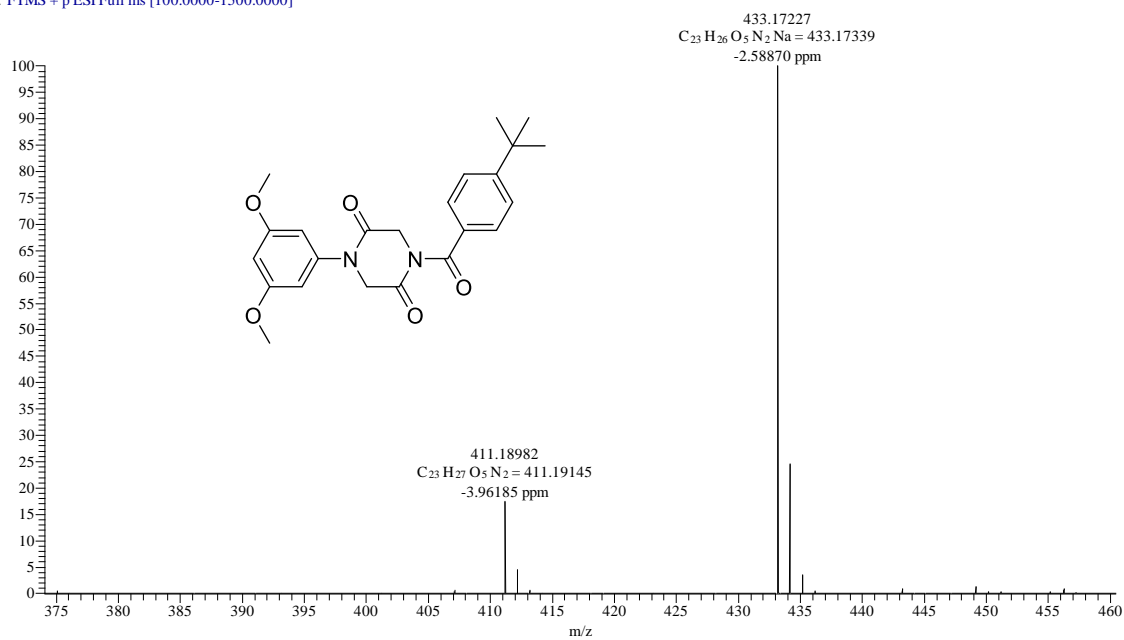

1-(3,5-dimethoxyphenyl)-4-acetylpiperazine-2,5-dione (**9k**)

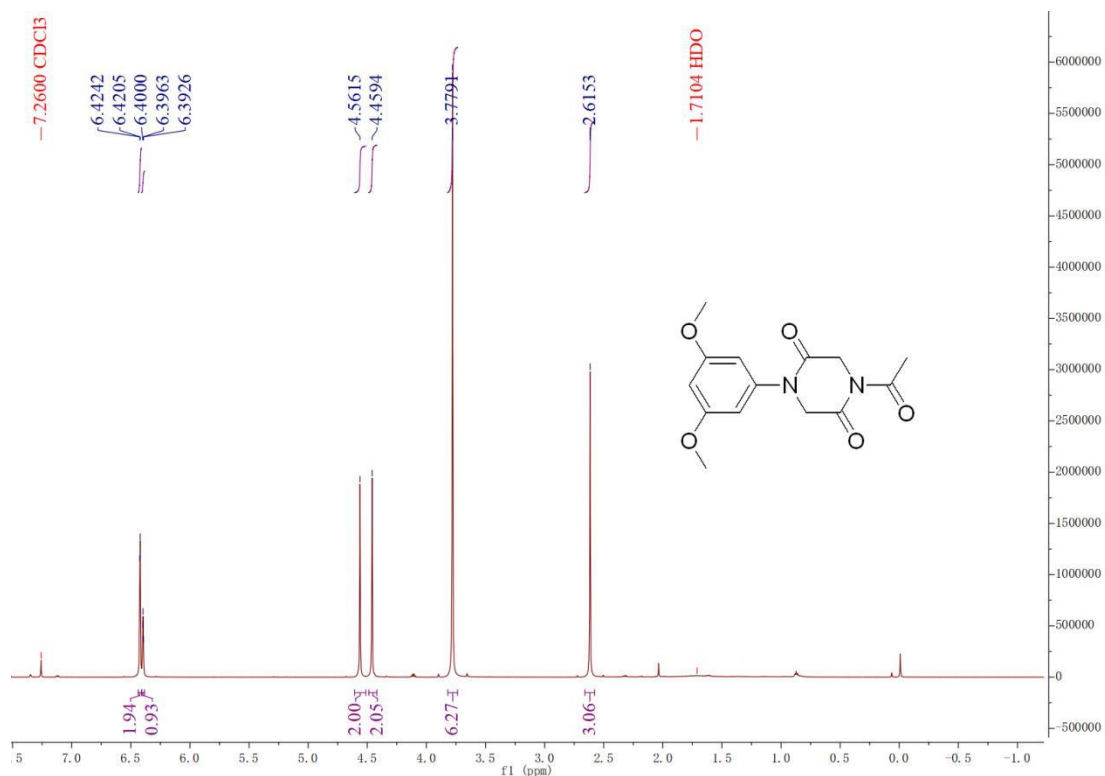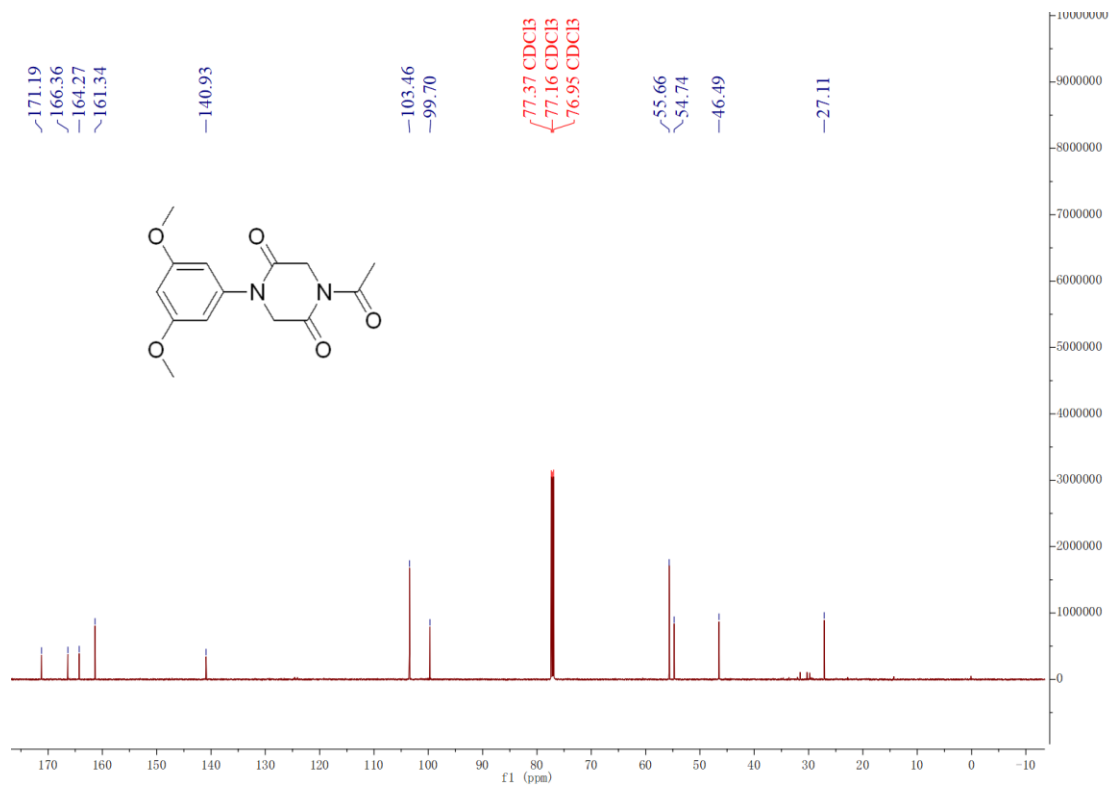

X7 #24 RT: 0.10 AV: 1 NL: 1.70E9  
T: FTMS + p ESI Full ms [100.0000-1500.0000]

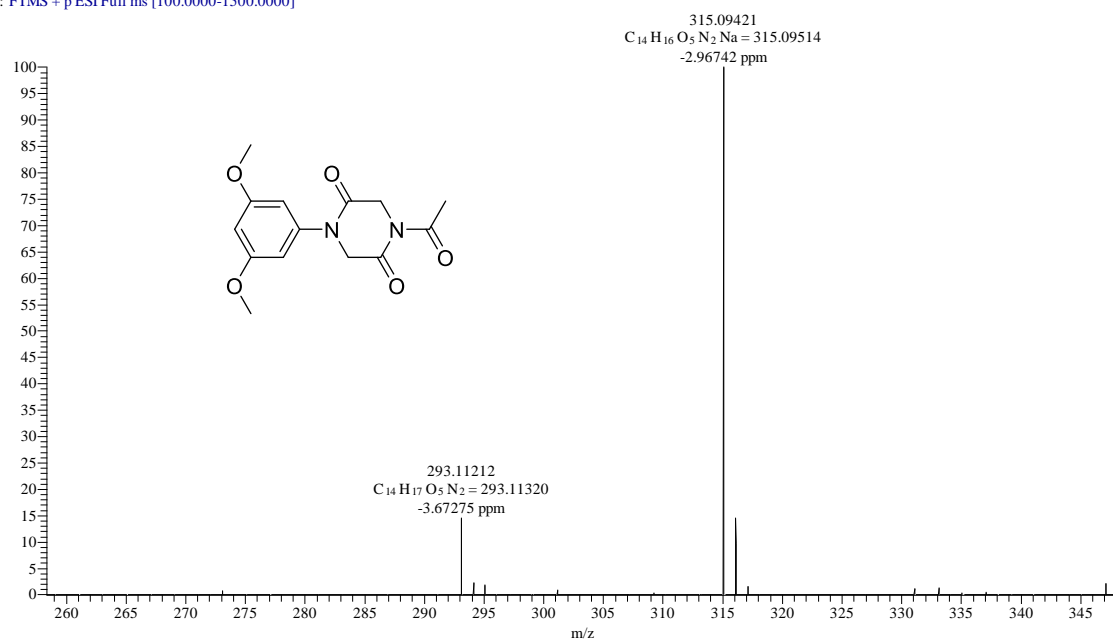

1-(3,5-dimethoxyphenyl)-4-(3-bromobenzoyl)piperazine-2,5-dione (9l)

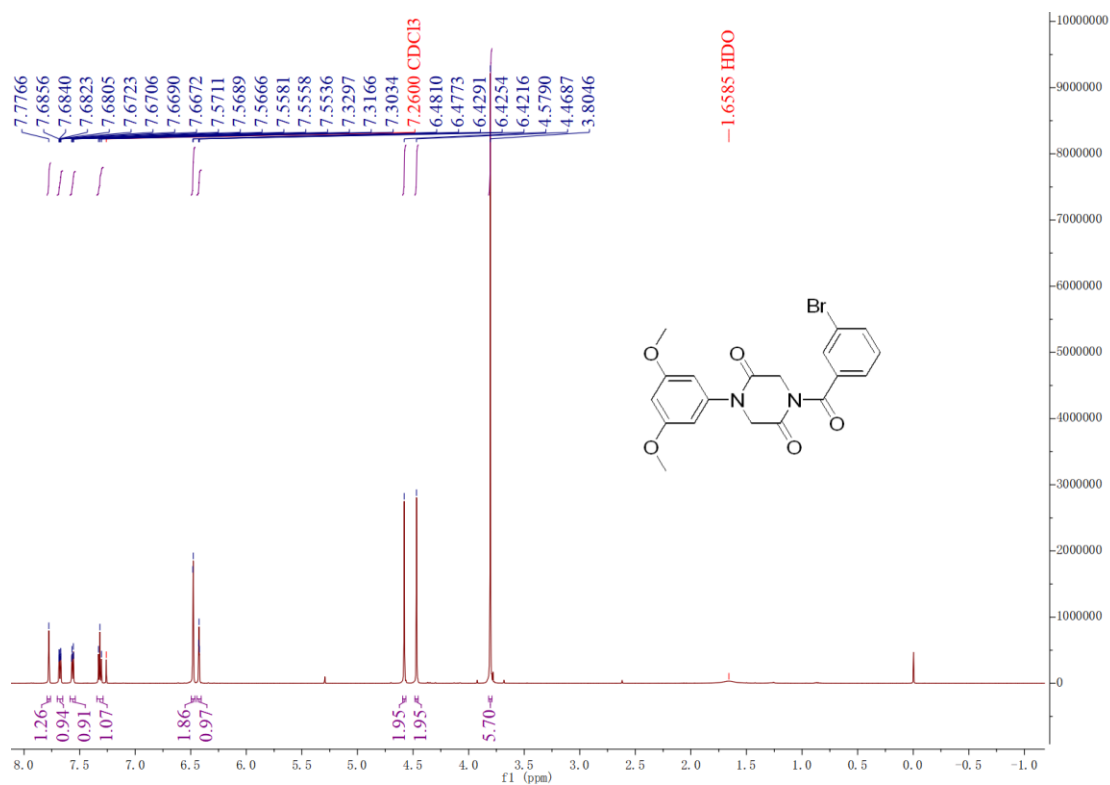

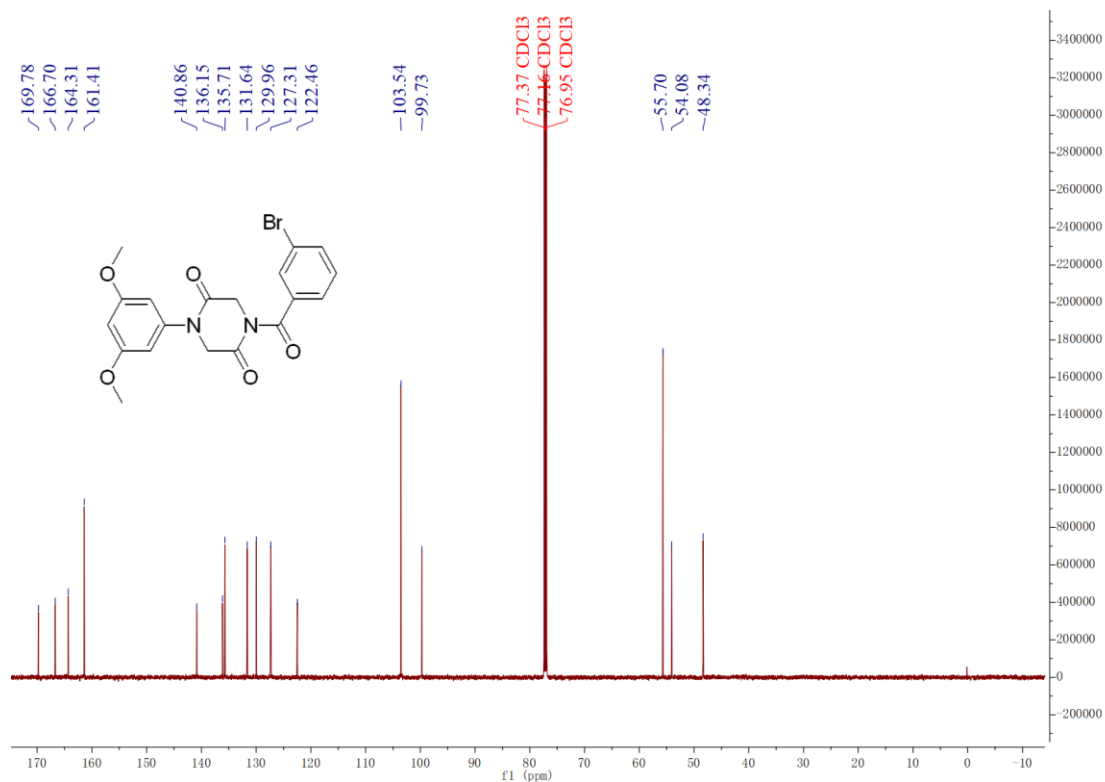

X8\_210901112554 #6 RT: 0.03 AV: 1 NL: 2.25E8  
T: FTMS + p ESI Full ms [200.0000-3000.0000]

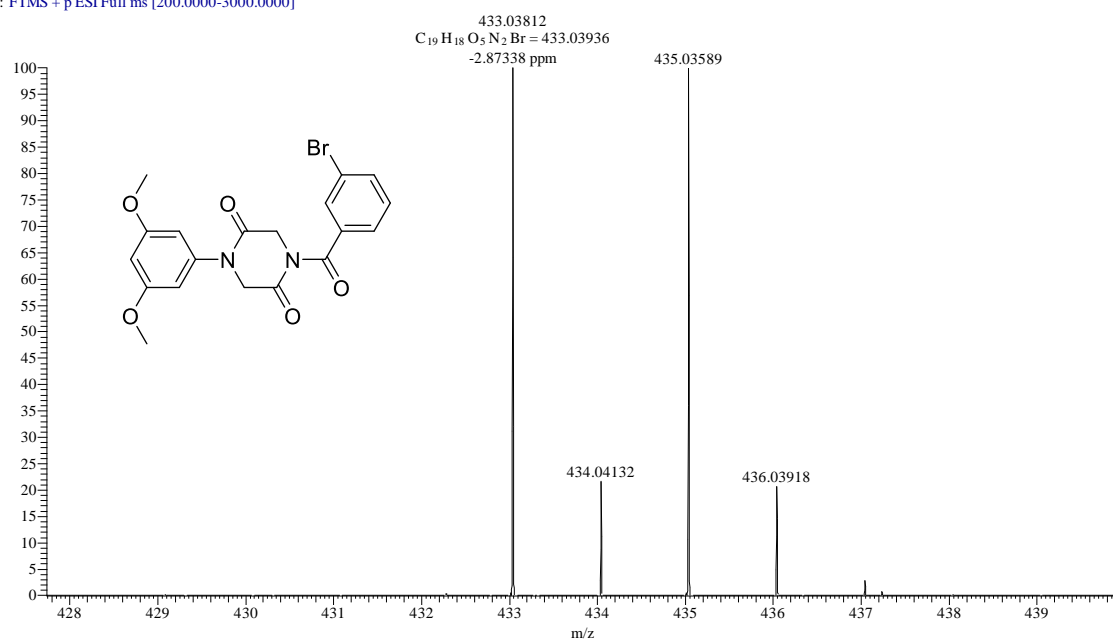

*1-(3,5-dimethoxyphenyl)-4-propionylpiperazine-2,5-dione (9m)*

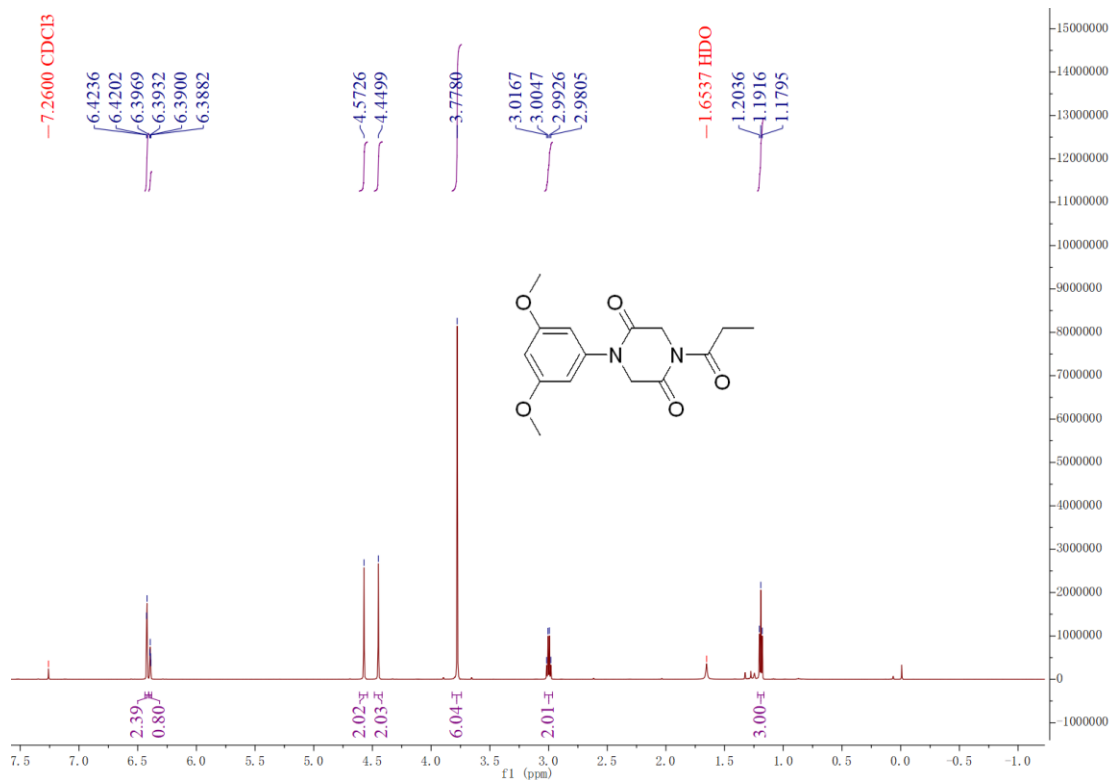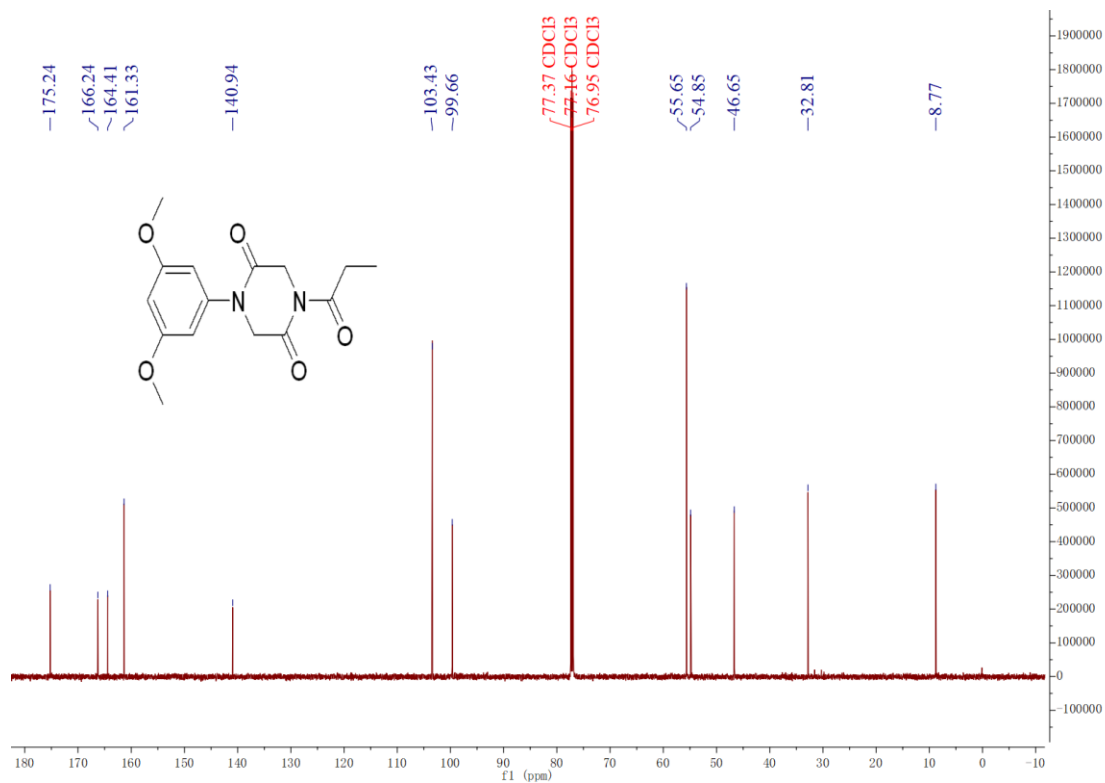

X9 #42 RT: 0.18 AV: 1 NL: 2.74E9  
T: FTMS + p ESI Full ms [100.0000-1500.0000]

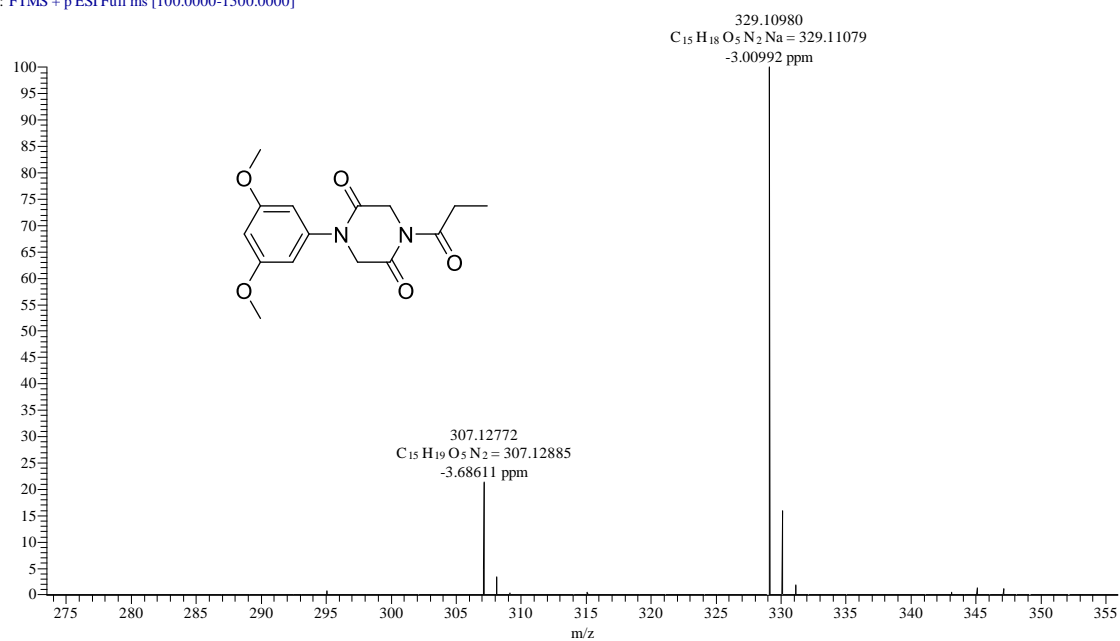

1-(3,5-dimethoxyphenyl)-4-butyrylpiperazine-2,5-dione (9n)

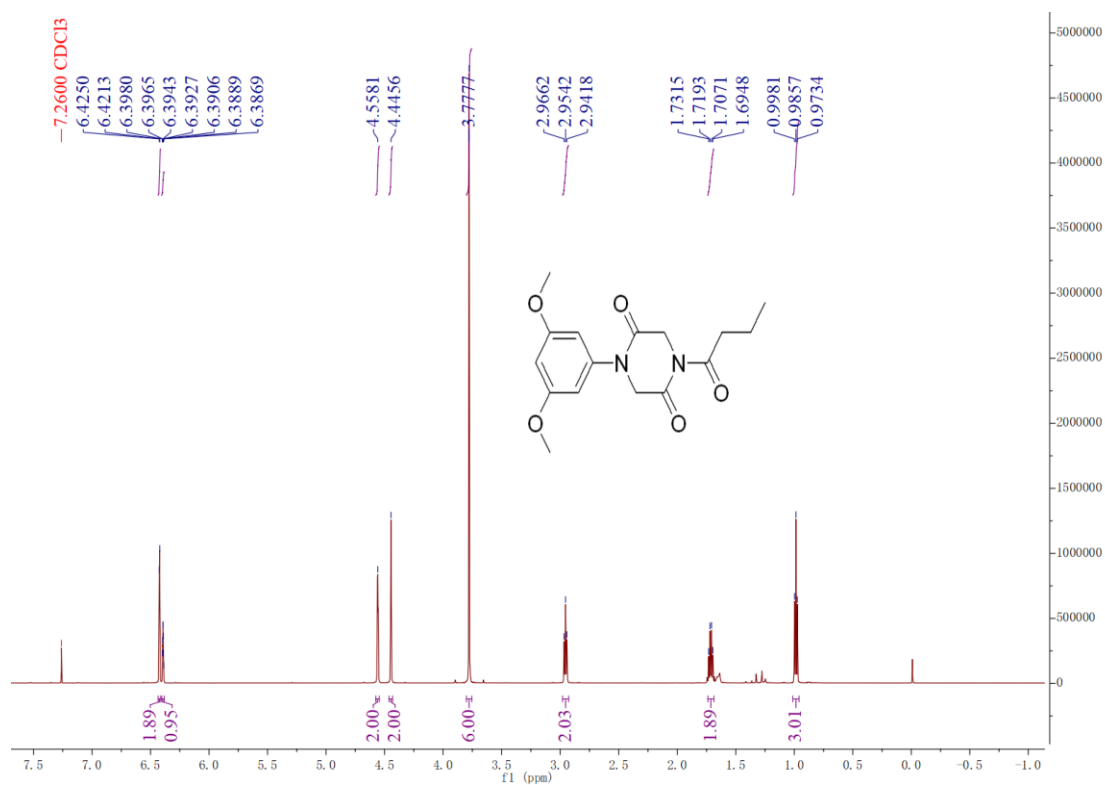

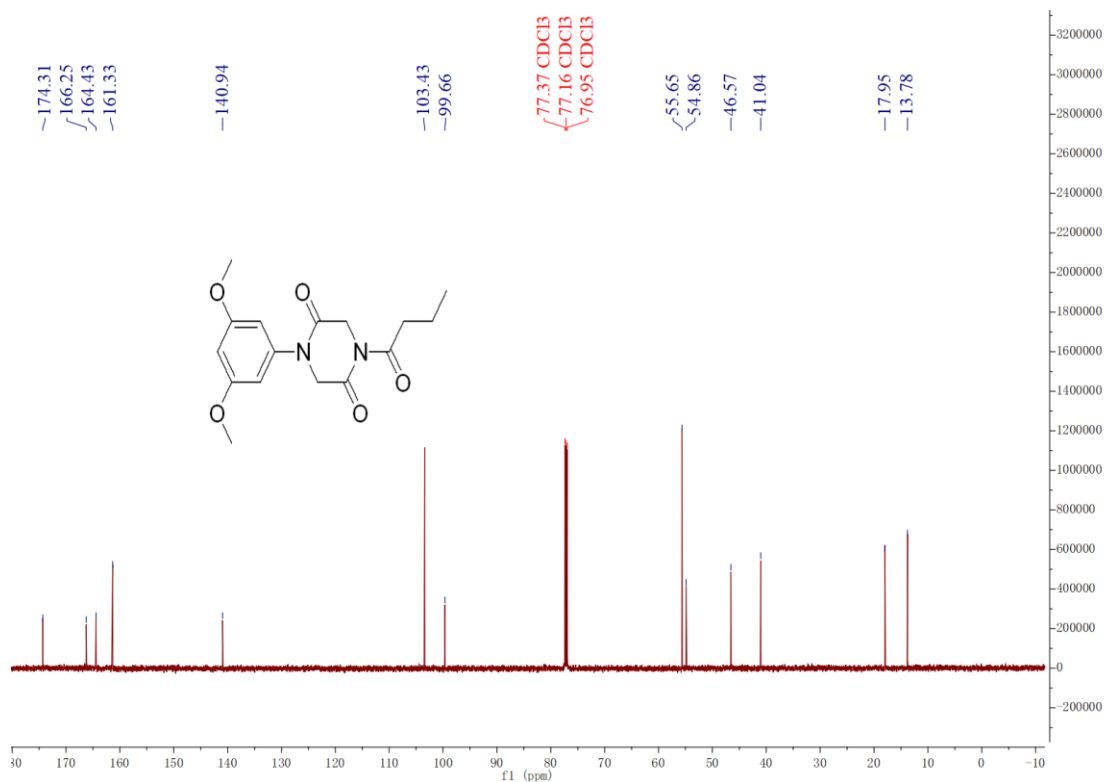

X10 #40 RT: 0.18 AV: 1 NL: 1.85E9  
T: FTMS + p ESI Full ms [100.0000-1500.0000]

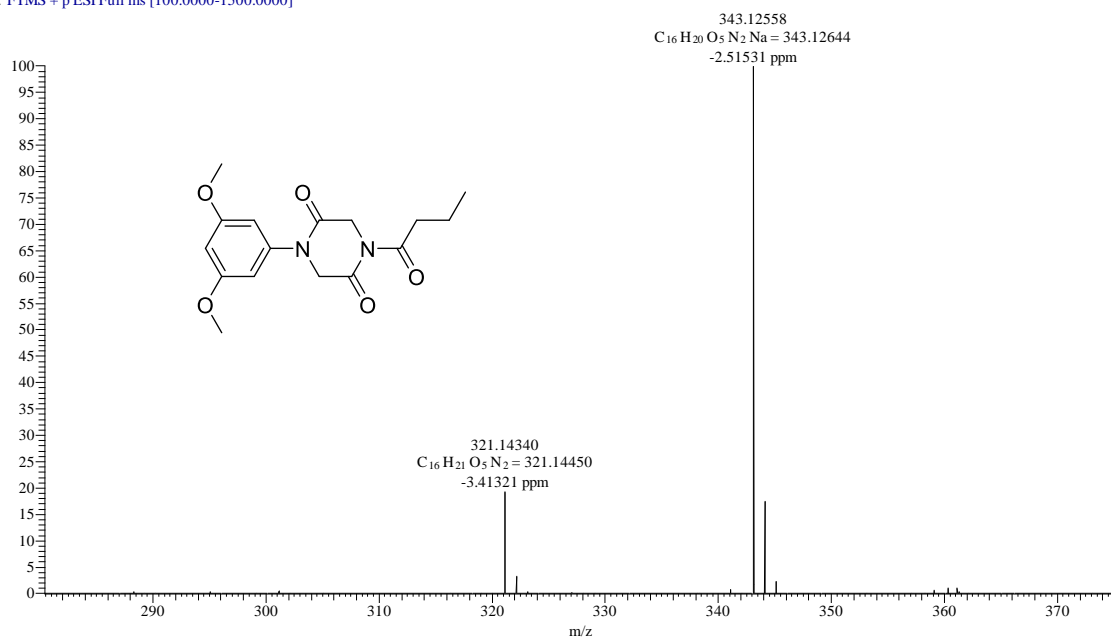

1-(3,5-difluorobenzoyl)-4-(3,5-dimethoxyphenyl)piperazine-2,5-dione (**9o**)

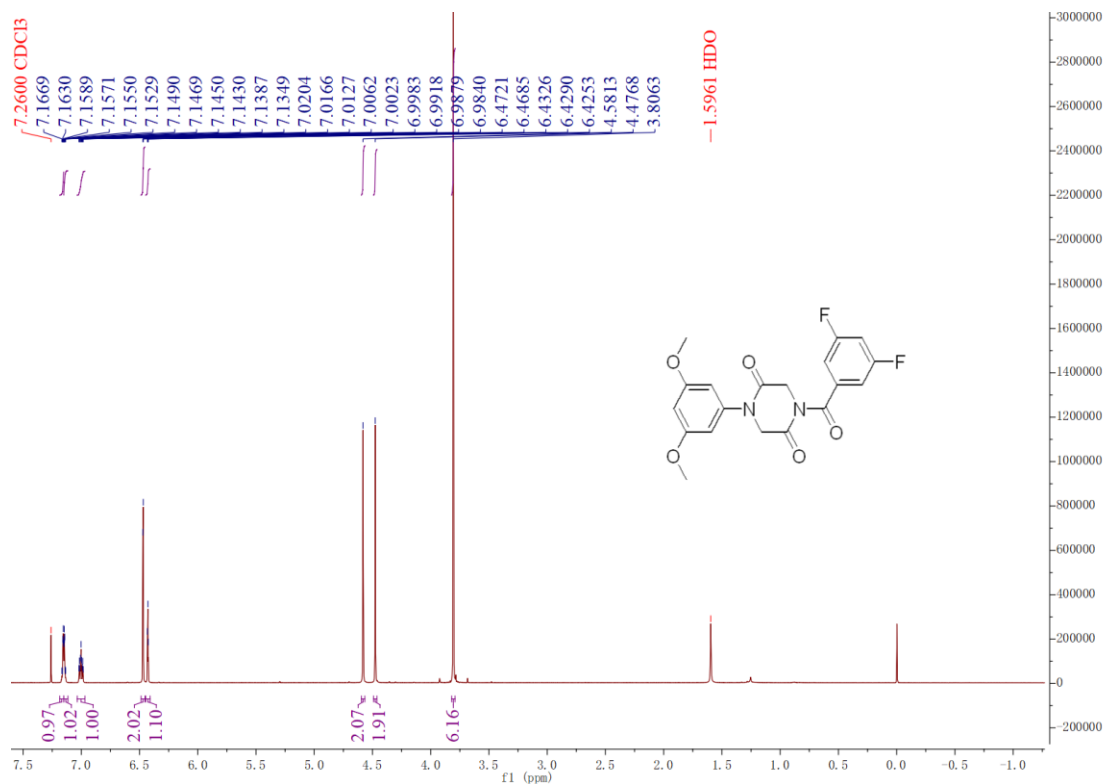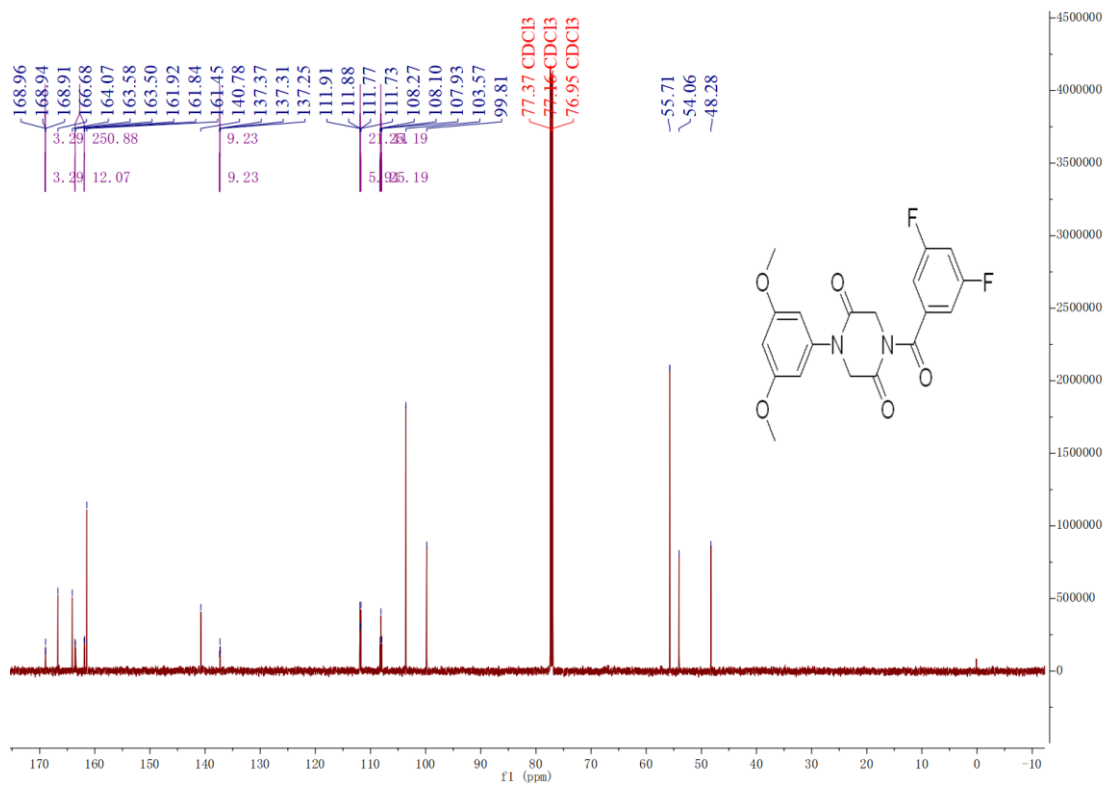

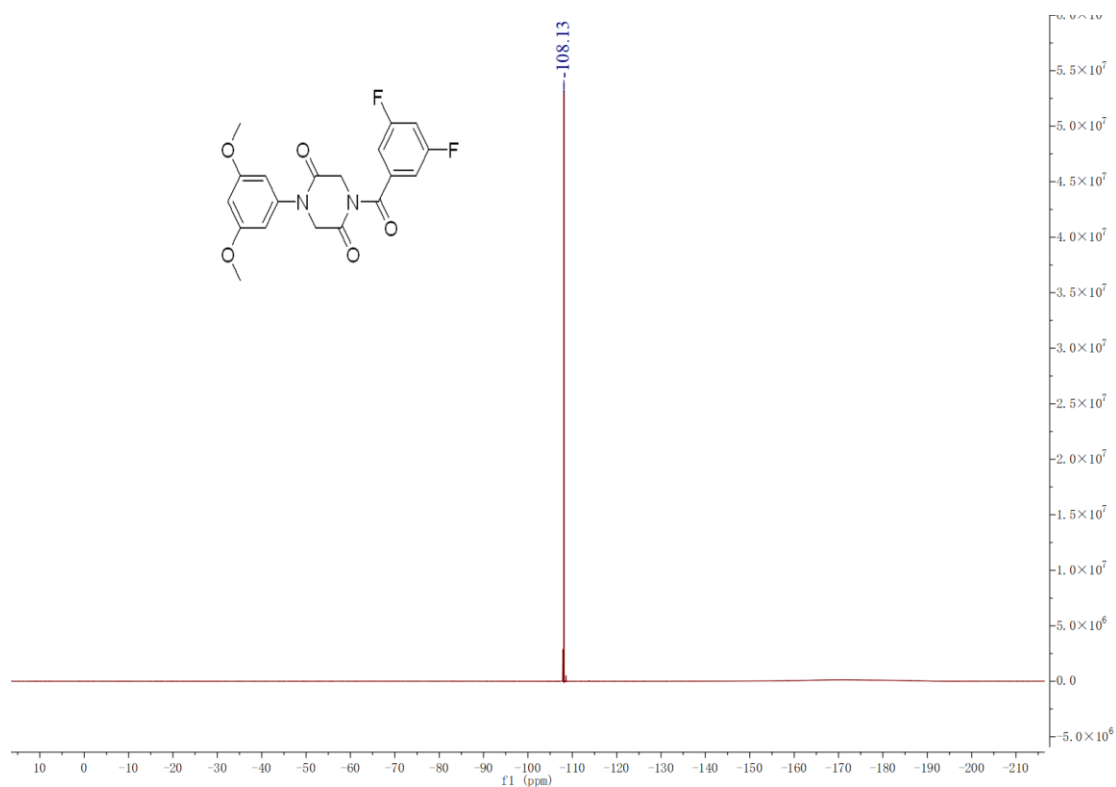

X14 #67 RT: 0.30 AV: 1 NL: 6.70E8  
T: FTMS + p ESI Full ms [100.0000-1500.0000]

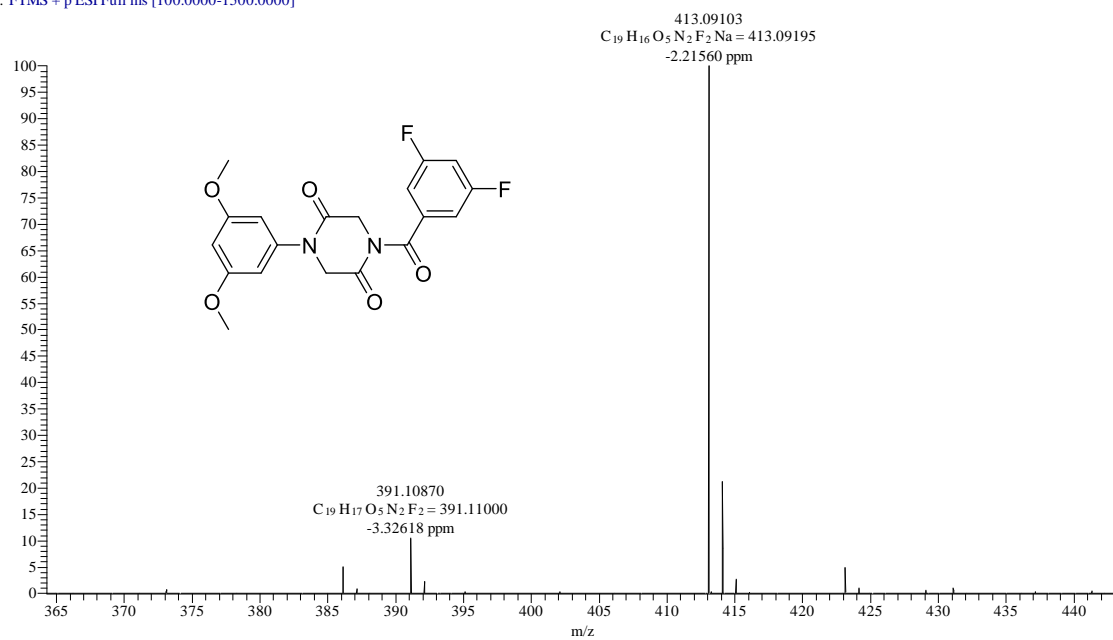

*1-(3,5-dimethoxyphenyl)-4-pivaloylpiperazine-2,5-dione (9p)*

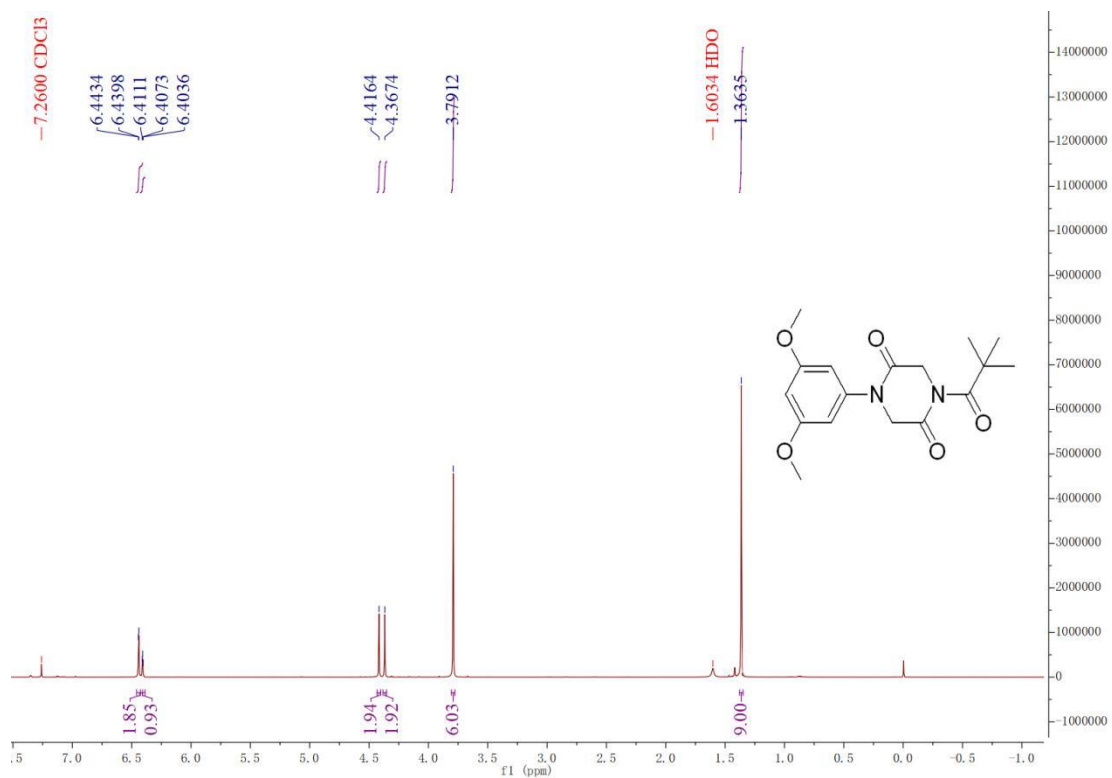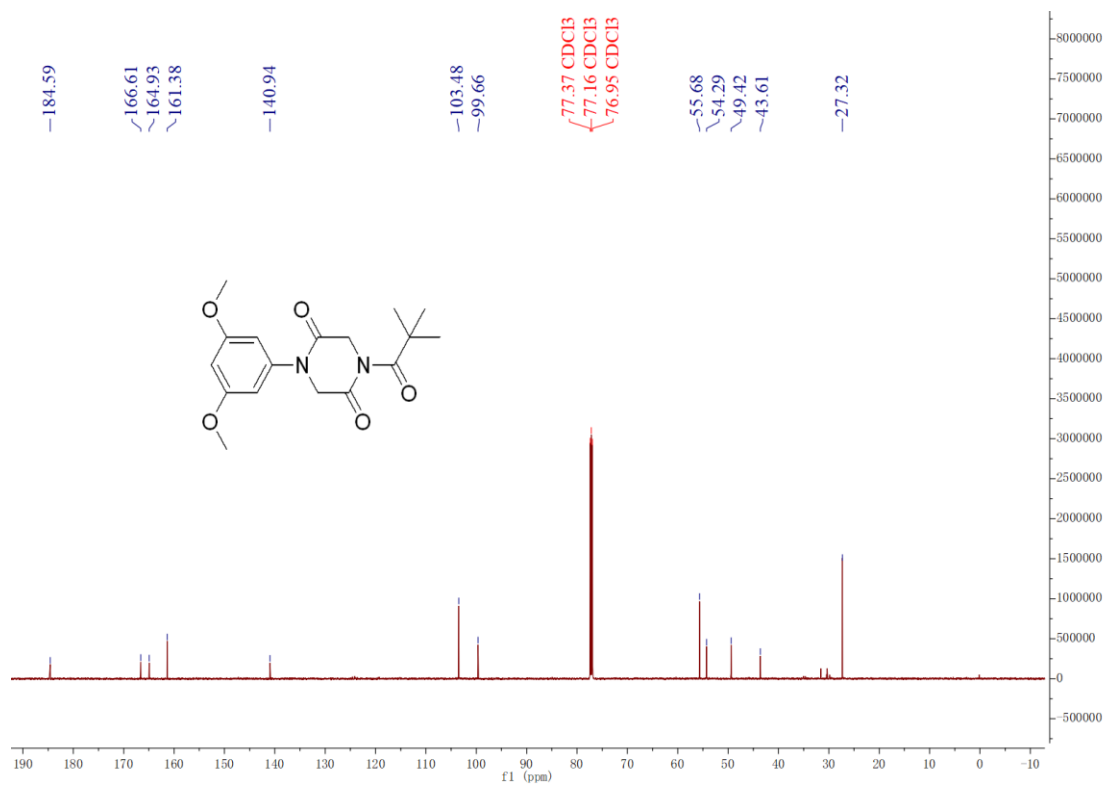

X15 #40-41 RT: 0.18-0.18 AV: 2 NL: 1.95E9  
T: FTMS + p ESI Full ms [100.0000-1500.0000]

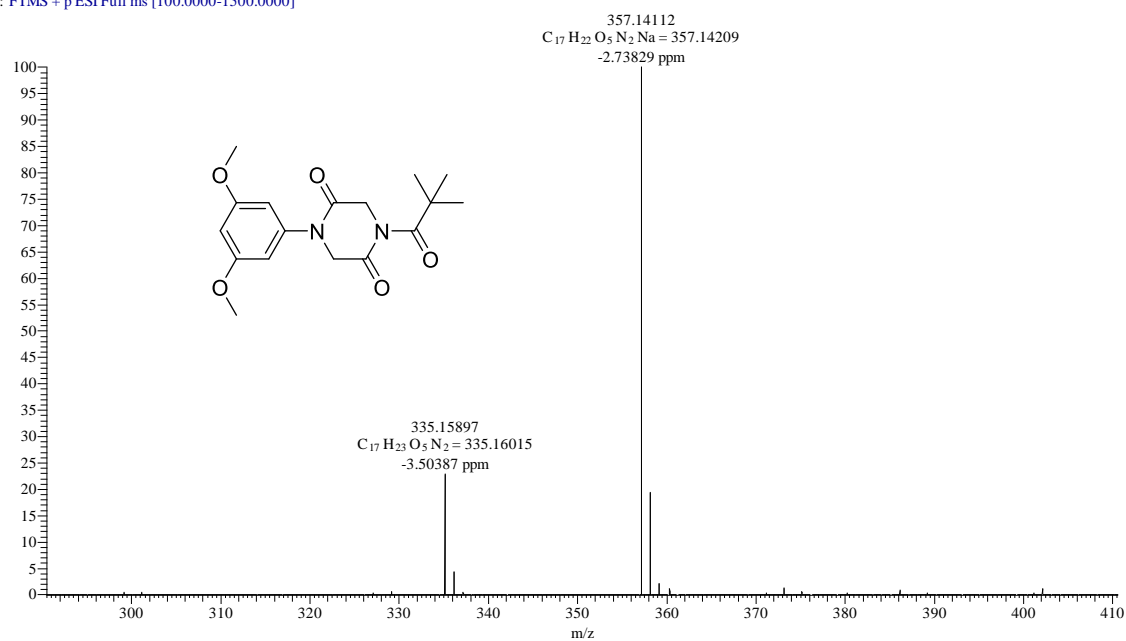

1-(3,5-dimethoxyphenyl)-4-(cyclopropanecarbonyl)piperazine-2,5-dione (9q)

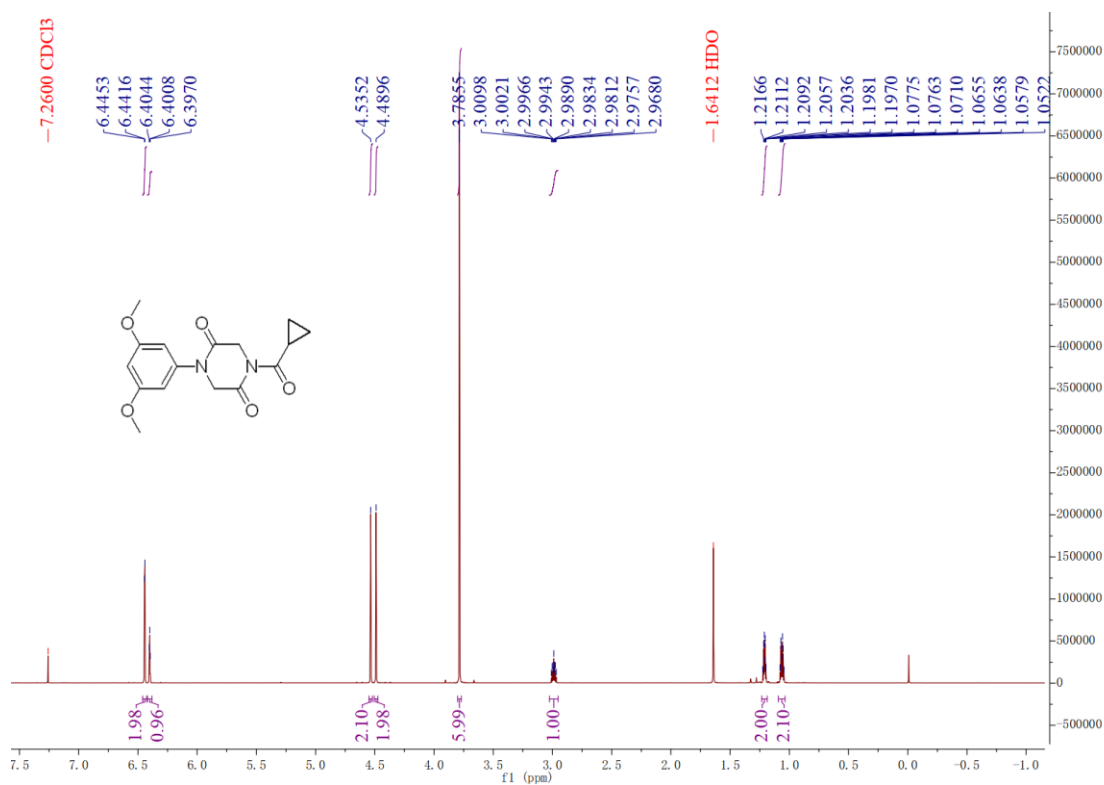

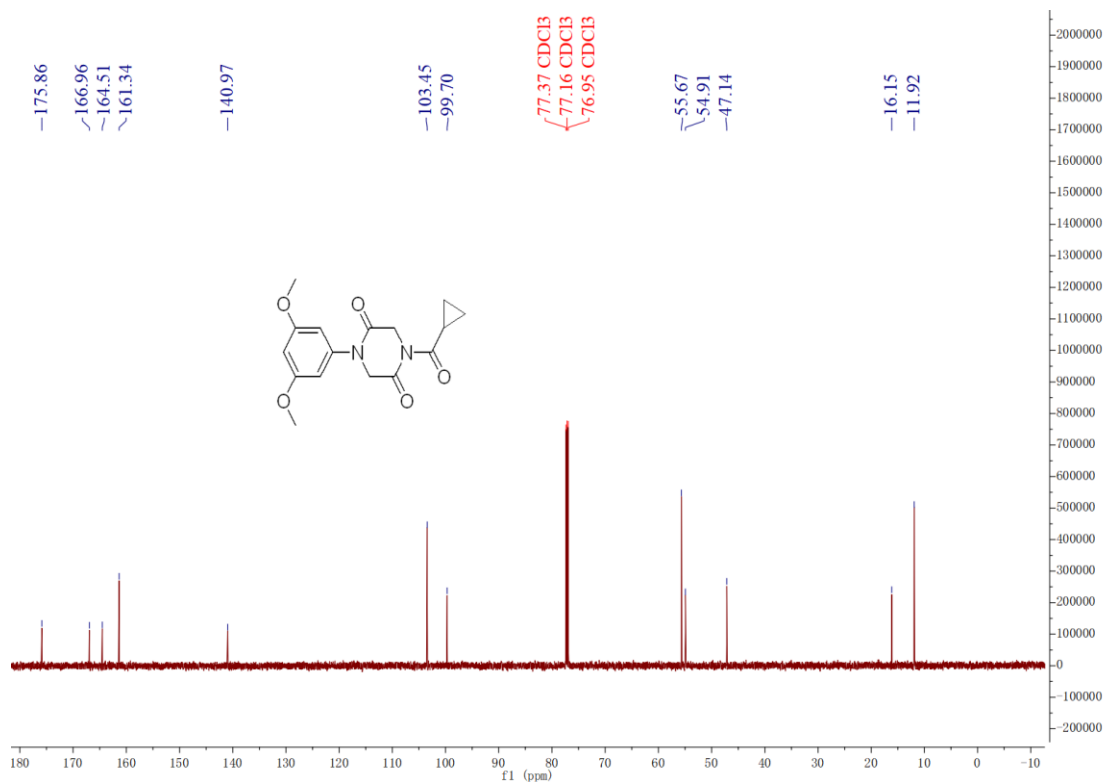

X16 #38 RT: 0.17 AV: 1 NL: 1.83E9  
T: FTMS + p ESI Full ms [100.0000-1500.0000]

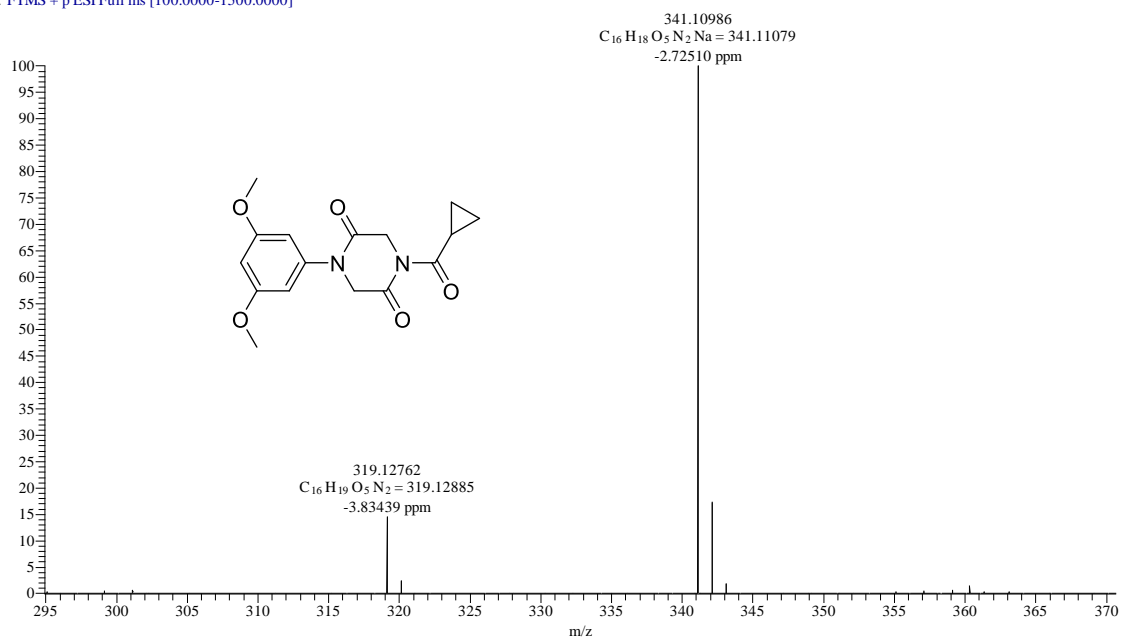

*1-(3,5-dimethoxyphenyl)-4-(3-cyclopentylpropanoyl)piperazine-2,5-dione (9r)*

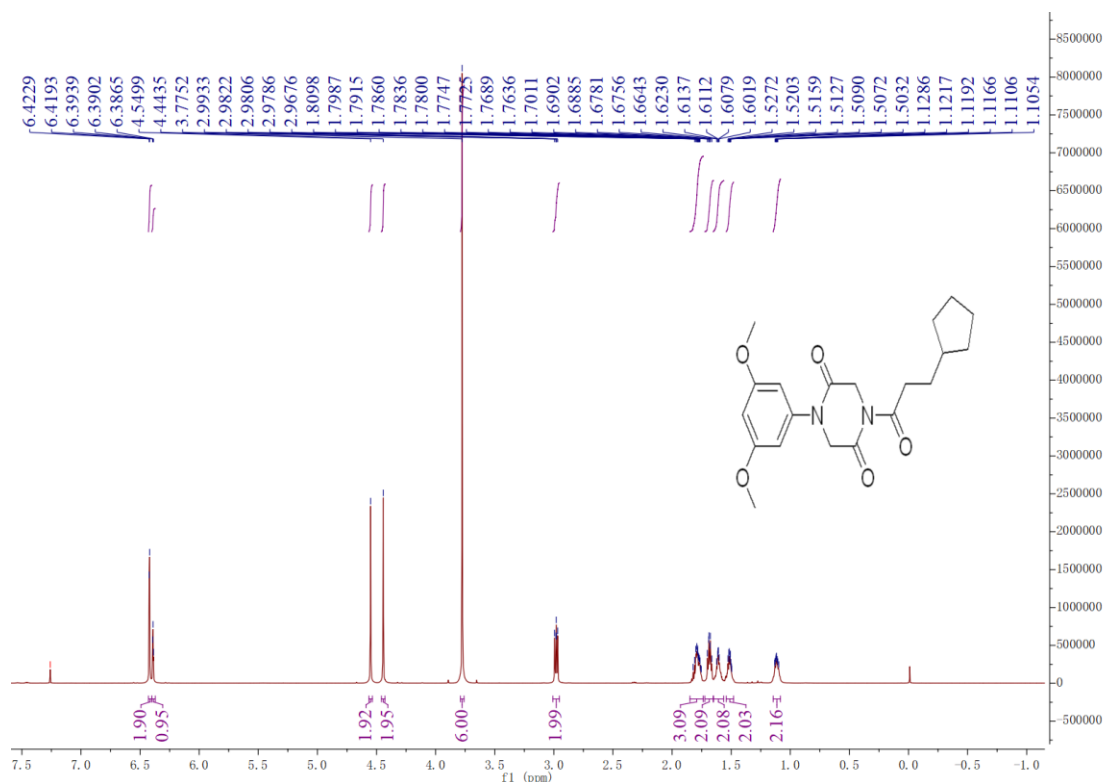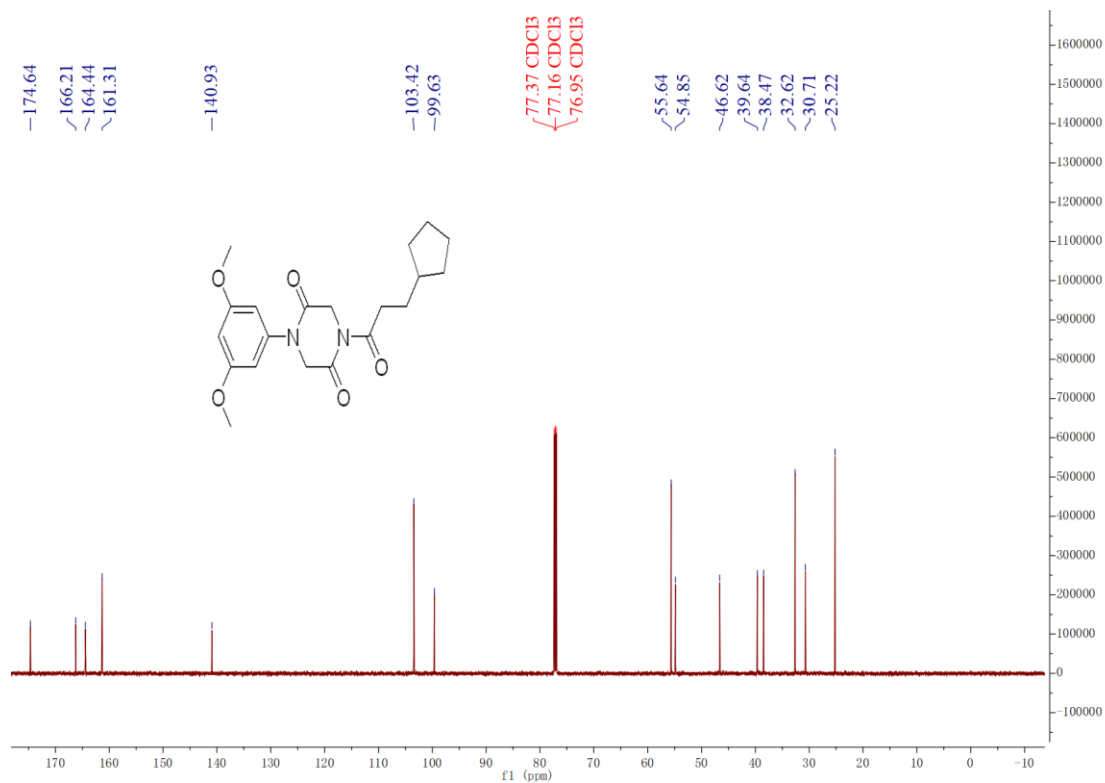

X18 #117 RT: 0.52 AV: 1 NL: 1.26E9  
T: FTMS + p ESI Full ms [100.0000-1500.0000]

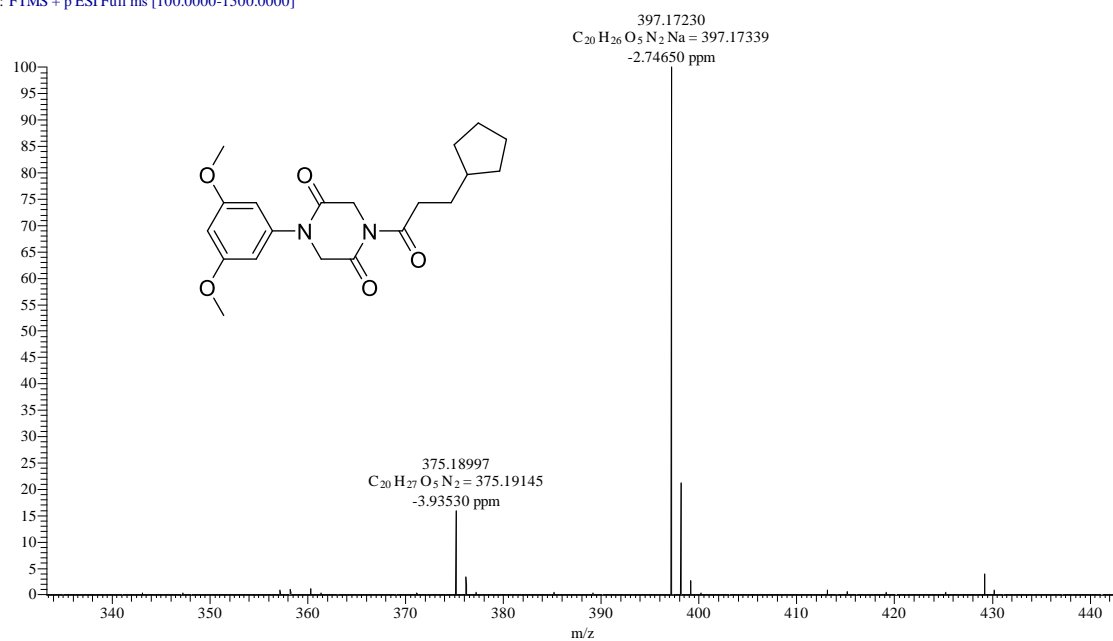

1-(3,5-dimethoxyphenyl)-4-(2-methoxyacetyl)piperazine-2,5-dione (9s)

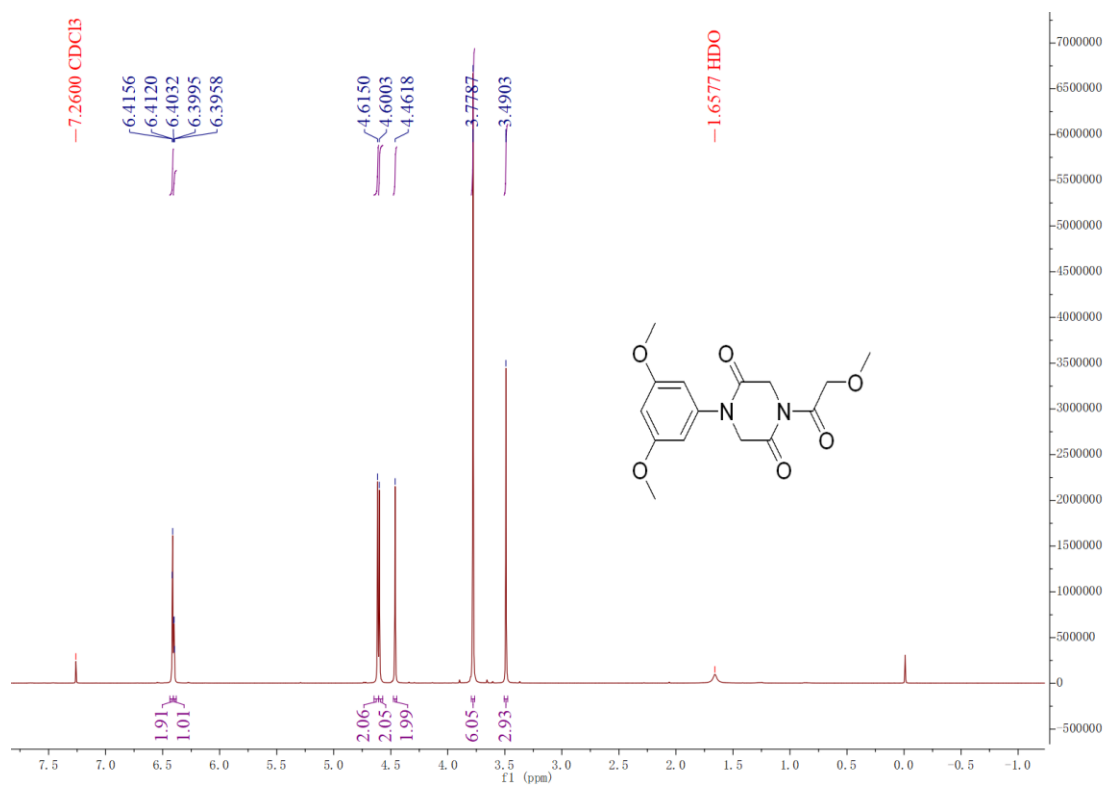

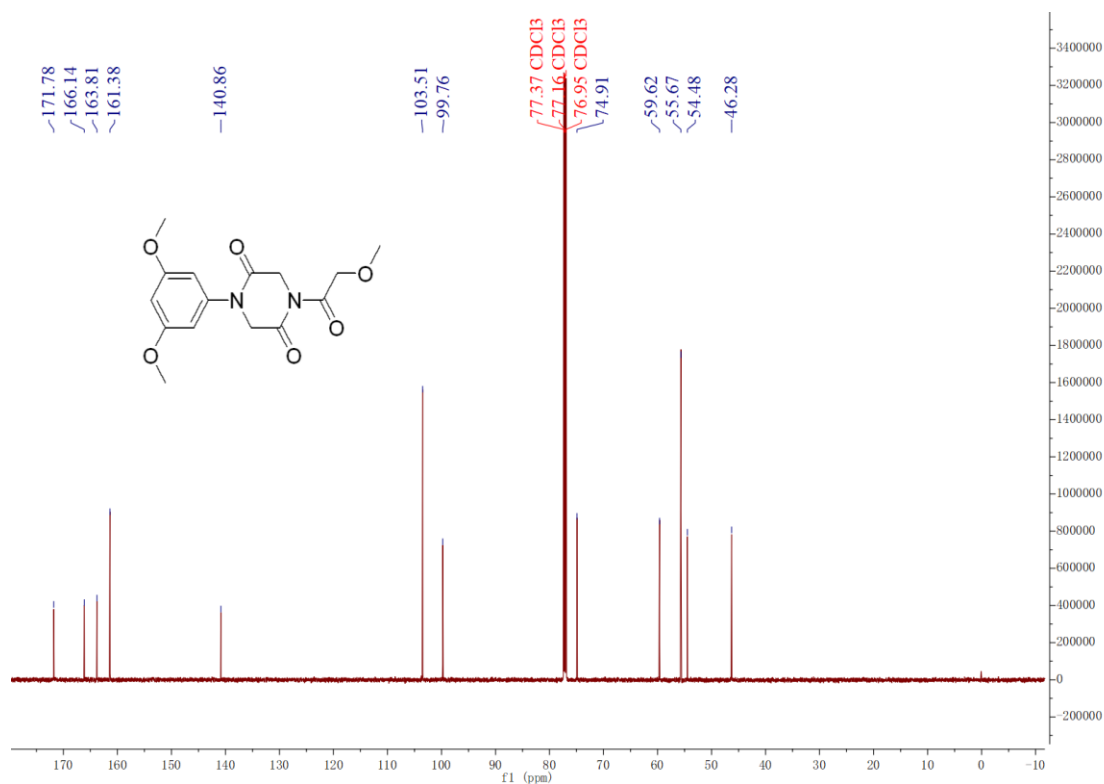

X20 #46 RT: 0.20 AV: 1 NL: 1.92E9  
T: FTMS + p ESI Full ms [100.0000-1500.0000]

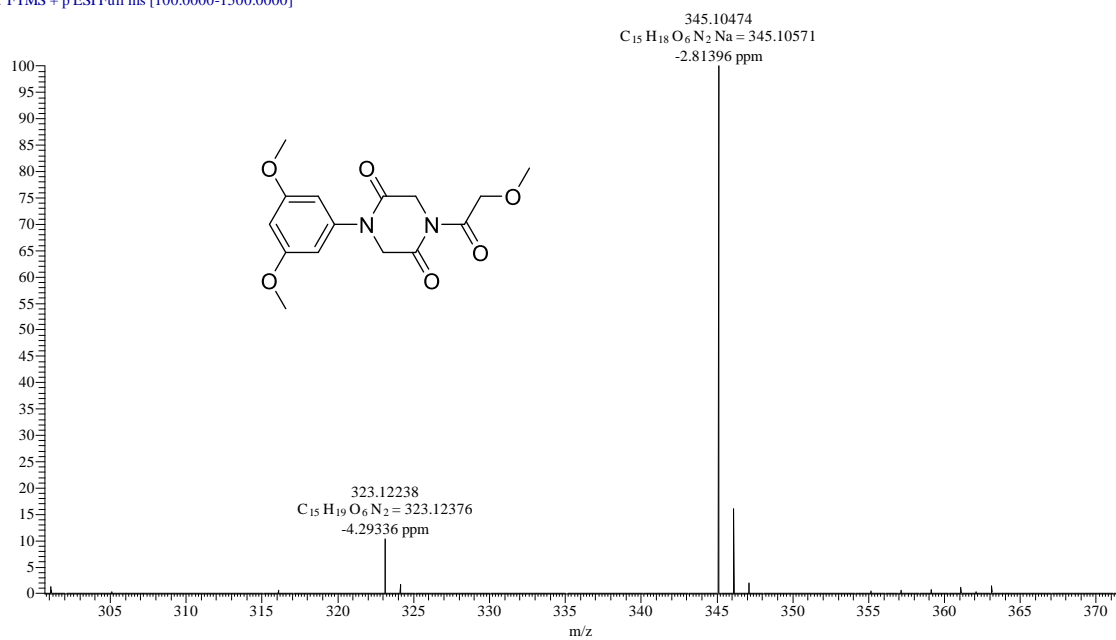

Supplement: s1 [file s1]
